# Supplementary material
Source: MDPI journal article supplement (doi:10.3390/su18126363)
Supplement: s1 [file sustainability-4294601-supplementary.pdf › sustainability-4294601-supplementary.pdf]

Table S1. Supplementary Material — Analyzed Literature Corpus

Dimensioning Sustainable Project Management in Productive Sectors: Strategic Alignment, Emerging Practices, and Implementation Tensions

Garzón-Agudelo, D.M.; Sarmiento-Rojas, J.A.; Rueda-Varón, M.J. | Sustainability (MDPI) | ID: sustainability-4294601

| ID | Reference (Author, Year, DOI)                                                                                                                                                                                                                                                                                                      | Main Research Aim                                                                                                                                                                           | Sustainability Framework / Definition                                                                                                                                                                                     | Productive Sector(s)                                                                                                                                       | Qualitative Themes (used in synthesis)                                                                                                                                                                                                                                               | Quantitative Variables / Factors                                                                                                                                                                                                                             | Link with Project Management                                                                                                                                                                                                                                                       | TBL / ESG Criteria Applied                                                                                                                        | Key Meta-Aggregable Finding                                                                                                                                                                                                                                                                                  |
|----|------------------------------------------------------------------------------------------------------------------------------------------------------------------------------------------------------------------------------------------------------------------------------------------------------------------------------------|---------------------------------------------------------------------------------------------------------------------------------------------------------------------------------------------|---------------------------------------------------------------------------------------------------------------------------------------------------------------------------------------------------------------------------|------------------------------------------------------------------------------------------------------------------------------------------------------------|--------------------------------------------------------------------------------------------------------------------------------------------------------------------------------------------------------------------------------------------------------------------------------------|--------------------------------------------------------------------------------------------------------------------------------------------------------------------------------------------------------------------------------------------------------------|------------------------------------------------------------------------------------------------------------------------------------------------------------------------------------------------------------------------------------------------------------------------------------|---------------------------------------------------------------------------------------------------------------------------------------------------|--------------------------------------------------------------------------------------------------------------------------------------------------------------------------------------------------------------------------------------------------------------------------------------------------------------|
| 1  | Magano, J.; Silvius, G.; Nogueira, T.; Hamed, F. Consideration of Sustainability in Projects: A Cross-Sectional Quantitative Analysis. Sustainability 2024, 16, 1269. <a href="https://doi.org/10.3390/su16031269">https://doi.org/10.3390/su16031269</a> .                                                                        | The article defines SPM as project management that considers environmental, economic, and social aspects across the life cycle, with stakeholder benefits and ethical conduct.              | The sustainability framework or definition is based on digital technologies and data-driven practices, with attention to economic, social, and environmental concerns.                                                    | Main productive sector(s): construction and infrastructure, energy, manufacturing, information technology and digital services, and public administration. | Qualitative themes used in the synthesis include BREEAM/LEED, and digital technologies and data-driven practices, with emphasis on sustainability integration, implementation conditions, and managerial implications.                                                               | Variables or factors considered include digital technologies and data-driven practices, especially those affecting implementation, performance, risk, value, and sustainability outcomes.                                                                    | The link with project management is established through social dimension, environmental dimension, economic dimension, and digital technologies and data-driven practices, showing how sustainability reshapes planning, implementation, monitoring, control, or success criteria. | TBL criteria are explicitly addressed through economic, social, and environmental dimensions.                                                     | The key meta-aggregable finding is that sustainability-related practices and implementation conditions requires changes in governance, decision criteria, project practices, or stakeholder coordination to strengthen sustainable outcomes.                                                                 |
| 2  | Saxena, A.; Singh, R.; Gehlot, A.; Akram, S.V.; Twala, B.; Singh, A.; Montero, E.C.; Priyadarshi, N. Technologies Empowered Environmental, Social, and Governance (ESG): An Industry 4.0 Landscape. Sustainability 2023, 15, 309. <a href="https://doi.org/10.3390/su15010309">https://doi.org/10.3390/su15010309</a> .            | The article states that ESG metrics are used to assess an organization's sustainability level and are linked to the achievement of the 2030 SDGs.                                           | No single formal definition of sustainability is reported; the article frames the concept through ESG, SDGs/2030 Agenda, and digital technologies and data-driven practices.                                              | Main productive sector(s): energy, and logistics and supply chain.                                                                                         | Qualitative themes used in the synthesis include ESG, SDGs/2030 Agenda, and digital technologies and data-driven practices, with emphasis on sustainability integration, implementation conditions, and managerial implications.                                                     | Variables or factors considered include ESG, and digital technologies and data-driven practices, especially those affecting implementation, performance, risk, value, and sustainability outcomes.                                                           | A direct connection with formal project management standards or life-cycle processes is not explicitly reported.                                                                                                                                                                   | ESG criteria are explicitly addressed, including environmental, social, and governance concerns and their managerial or performance implications. | The key meta-aggregable finding is that ESG, financial performance and investment, and digital technologies and data-driven practices requires changes in governance, decision criteria, project practices, or stakeholder coordination to strengthen sustainable outcomes.                                  |
| 3  | Tillu, P. G., Digalwar, A. K., Singh, S. R., & Reosekar, R. S. (2024). Towards sustainable automobile ecosystem in India: Integrated analysis of technical, economic, and ESG dimensions. Cleaner Environmental Systems, 14, 100210.                                                                                               | The article defines sustainability using the Brundtland formulation and associates it with meeting present needs without compromising future generations.                                   | The sustainability framework or definition is based on Brundtland sustainable development definition, and digital technologies and data-driven practices, with attention to economic, social, and environmental concerns. | Main productive sector(s): automotive industry, and corporate CSR programs.                                                                                | Qualitative themes used in the synthesis include digital technologies and data-driven practices, with emphasis on sustainability integration, implementation conditions, and managerial implications.                                                                                | Variables or factors considered include environmental dimension, and digital technologies and data-driven practices, especially those affecting implementation, performance, risk, value, and sustainability outcomes.                                       | The link with project management is established through digital technologies and data-driven practices, showing how sustainability reshapes planning, implementation, monitoring, control, or success criteria.                                                                    | ESG criteria are explicitly addressed, including environmental, social, and governance concerns and their managerial or performance implications. | The key meta-aggregable finding is that digital technologies and data-driven practices requires changes in governance, decision criteria, project practices, or stakeholder coordination to strengthen sustainable outcomes.                                                                                 |
| 4  | Mariani, C., Caccialanza, A., Bugarčić, M., Slavkovic, M., & Mancini, M. Enhancing project-based organization performance through ESG practices: the role of organizational agility. Management Decision. DOI: 10.1108/MD-04-2024-0967.                                                                                            | ESG practices are defined as strategies and actions intended to achieve sustainable and ethical impacts on society and the environment.                                                     | The sustainability framework or definition is based on ESG, and digital technologies and data-driven practices, with attention to economic, social, and environmental concerns.                                           | Main productive sector(s): construction and infrastructure, energy, and information technology and digital services.                                       | Qualitative themes used in the synthesis include ESG, and digital technologies and data-driven practices, with emphasis on sustainability integration, implementation conditions, and managerial implications.                                                                       | Variables or factors considered include ESG, governance, and digital technologies and data-driven practices, especially those affecting implementation, performance, risk, value, and sustainability outcomes.                                               | The link with project management is established through ESG, and digital technologies and data-driven practices, showing how sustainability reshapes planning, implementation, monitoring, control, or success criteria.                                                           | The evidence addresses social dimension, environmental dimension, and economic dimension, even when no formal TBL label is used.                  | The key meta-aggregable finding is that ESG, organizational agility, and digital technologies and data-driven practices requires changes in governance, decision criteria, project practices, or stakeholder coordination to strengthen sustainable outcomes.                                                |
| 5  | Mahmood, H., & Furqan, M. (2025). Project management for sustainability in times of uncertainty: A systematic review of economic policy uncertainty and corporate strategic responses. Journal of Project Management, 10, 781–794. doi: 10.5267/j.jpm.2025.7.001. (p. 1).                                                          | The article aligns CESP with the SDGs and analyzes the role of project management and corporate strategic responses under economic policy uncertainty.                                      | The sustainability framework or definition is based on SDGs/2030 Agenda, environmental dimension, and digital technologies and data-driven practices, with attention to environmental dimension.                          | Main productive sector(s): energy, food and beverage systems, healthcare, and real estate.                                                                 | Qualitative themes used in the synthesis include P5/PRiSM sustainable project management guidance, environmental dimension, and digital technologies and data-driven practices, with emphasis on sustainability integration, implementation conditions, and managerial implications. | Variables or factors considered include governance, and digital technologies and data-driven practices, especially those affecting implementation, performance, risk, value, and sustainability outcomes.                                                    | The link with project management is established through sustainability-related practices and implementation conditions, showing how sustainability reshapes planning, implementation, monitoring, control, or success criteria.                                                    | ESG criteria are explicitly addressed, including environmental, social, and governance concerns and their managerial or performance implications. | The key meta-aggregable finding is that financial performance and investment requires changes in governance, decision criteria, project practices, or stakeholder coordination to strengthen sustainable outcomes.                                                                                           |
| 6  | van Bueren, B.J.A., Leenders, M.A.A.M., Argus, K., Lim, W.M., Iyer-Raniga, U., & Sabani, A. (2025). Integrating sustainability into helix models for eco-innovation: The eco-5HM. Technovation, 143, 103211. <a href="https://doi.org/10.1016/j.technovation.2025.103211">https://doi.org/10.1016/j.technovation.2025.103211</a> . | The study reports that the integration between helix models and sustainability is unstable, narrow, and shallow because of the absence of representative goals, priorities, and indicators. | The sustainability framework or definition is based on digital technologies and data-driven practices, with attention to economic, social, and environmental concerns.                                                    | Main productive sector(s): information technology and digital services.                                                                                    | Qualitative themes used in the synthesis include P5/PRiSM sustainable project management guidance, and digital technologies and data-driven practices, with emphasis on sustainability integration, implementation conditions, and managerial implications.                          | Variables or factors considered include digital technologies and data-driven practices, and helix-based eco-innovation, especially those affecting implementation, performance, risk, value, and sustainability outcomes.                                    | The link with project management is established through PMBOK knowledge areas, PRINCE2, and life-cycle perspective, showing how sustainability reshapes planning, implementation, monitoring, control, or success criteria.                                                        | TBL criteria are explicitly addressed through economic, social, and environmental dimensions.                                                     | The key meta-aggregable finding is that economic dimension, digital technologies and data-driven practices, and helix-based eco-innovation requires changes in governance, decision criteria, project practices, or stakeholder coordination to strengthen sustainable outcomes.                             |
| 7  | Hikal, H. M. M., Abubakr, A. A. M., Abdelraheem, A. A., & Mohammed, S. M. A. (2025). Financial structures and their impact on project financial performance: Funding sources, and sustainability, empirical study. Journal of Project Management, 10, 853–866. doi: 10.5267/j.jpm.2025.6.003.                                      | The article states that the project financial structure, particularly the debt-equity mix, influences profitability, liquidity, and long-term viability.                                    | The sustainability framework or definition is based on Triple Bottom Line, ESG, SDGs/2030 Agenda, and digital technologies and data-driven practices, with attention to economic, social, and environmental concerns.     | Main productive sector(s): energy, and manufacturing.                                                                                                      | Qualitative themes used in the synthesis include SDGs/2030 Agenda, GRI reporting standards, and digital technologies and data-driven practices, with emphasis on sustainability integration, implementation conditions, and managerial implications.                                 | Variables or factors considered include financial performance and investment, and digital technologies and data-driven practices, especially those affecting implementation, performance, risk, value, and sustainability outcomes.                          | The link with project management is established through financial performance and investment, showing how sustainability reshapes planning, implementation, monitoring, control, or success criteria.                                                                              | TBL criteria are explicitly addressed through economic, social, and environmental dimensions.                                                     | The key meta-aggregable finding is that financial performance and investment requires changes in governance, decision criteria, project practices, or stakeholder coordination to strengthen sustainable outcomes.                                                                                           |
| 8  | Silva, L. F., & Rosamilha, N. J. (2024, Sept./Dec.). Sustainability, circular economy, and projects: research opportunities. Revista de Gestão e Projetos (GeP), 15(3), 463–475. Editorial. <a href="https://doi.org/10.5585/gep.v15i3.27650">https://doi.org/10.5585/gep.v15i3.27650</a> (pp. 463–475).                           | Sustainability is conceptualized as meeting present needs without compromising future generations while integrating economic, social, and environmental dimensions.                         | The sustainability framework or definition is based on sustainability-related practices and implementation conditions, with attention to economic, social, and environmental concerns.                                    | Main productive sector(s): construction and infrastructure, manufacturing, information technology and digital services, and logistics and supply chain.    | Qualitative themes used in the synthesis include P5/PRiSM sustainable project management guidance, and digital technologies and data-driven practices, with emphasis on sustainability integration, implementation conditions, and managerial implications.                          | Variables or factors considered include digital technologies and data-driven practices, especially those affecting implementation, performance, risk, value, and sustainability outcomes.                                                                    | The link with project management is established through sustainability-related practices and implementation conditions, showing how sustainability reshapes planning, implementation, monitoring, control, or success criteria.                                                    | The evidence addresses social dimension, environmental dimension, and economic dimension, even when no formal TBL label is used.                  | The key meta-aggregable finding is that social dimension, environmental dimension, and digital technologies and data-driven practices requires changes in governance, decision criteria, project practices, or stakeholder coordination to strengthen sustainable outcomes.                                  |
| 9  | Al-Marri, M.; Pinnington, A.H. Managing Sustainability Projects for Social Impact from a Corporate Social Responsibility Perspective. Sustainability 2022, 14, 6418. <a href="https://doi.org/10.3390/su14116418">https://doi.org/10.3390/su14116418</a> .                                                                         | The study uses a qualitative case, grounded theory, and NVivo 12 to analyze a program of seven projects involving 80 members.                                                               | The sustainability framework or definition is based on Brundtland sustainable development definition, with attention to economic, social, and environmental concerns.                                                     | Main productive sector(s): public administration.                                                                                                          | Qualitative themes used in the synthesis include PRINCE2, and digital technologies and data-driven practices, with emphasis on sustainability integration, implementation conditions, and managerial implications.                                                                   | Variables or factors considered include PRINCE2, and governance, especially those affecting implementation, performance, risk, value, and sustainability outcomes.                                                                                           | The link with project management is established through sustainability-related practices and implementation conditions, showing how sustainability reshapes planning, implementation, monitoring, control, or success criteria.                                                    | The evidence addresses social dimension, environmental dimension, and economic dimension, even when no formal TBL label is used.                  | The key meta-aggregable finding is that project success criteria, and digital technologies and data-driven practices requires changes in governance, decision criteria, project practices, or stakeholder coordination to strengthen sustainable outcomes.                                                   |
| 10 | Vrchota, J.; Rehoř, P.; Maříková, M.; Pech, M. Critical Success Factors of the Project Management in Relation to Industry 4.0 for Sustainability of Projects. Sustainability 2021, 13, 281. <a href="https://doi.org/10.3390/su13010281">https://doi.org/10.3390/su13010281</a> .                                                  | Sustainability is presented as an integral part of project management and is explicitly linked to the triple bottom line: economic, environmental, and social dimensions.                   | The sustainability framework or definition is based on digital technologies and data-driven practices, with attention to economic, social, and environmental concerns.                                                    | Main productive sector(s): manufacturing, and information technology and digital services.                                                                 | Qualitative themes used in the synthesis include sustainability-related practices and implementation conditions, with emphasis on sustainability integration, implementation conditions, and managerial implications.                                                                | Variables or factors considered include environmental dimension, and digital technologies and data-driven practices, especially those affecting implementation, performance, risk, value, and sustainability outcomes.                                       | The link with project management is established through governance, showing how sustainability reshapes planning, implementation, monitoring, control, or success criteria.                                                                                                        | TBL criteria are explicitly addressed through economic, social, and environmental dimensions.                                                     | The key meta-aggregable finding is that quality outcomes, time performance, cost/budget performance, social dimension, environmental dimension, and economic dimension requires changes in governance, decision criteria, project practices, or stakeholder coordination to strengthen sustainable outcomes. |
| 11 | Nunes, M.; Abreu, A.; Saraiva, C. Identifying Project Corporate Behavioral Risks to Support Long-Term Sustainable Cooperative Partnerships. Sustainability 2021, 13, 6347. <a href="https://doi.org/10.3390/su13116347">https://doi.org/10.3390/su13116347</a> .                                                                   | The article defines organizational sustainability as a holistic, consistent, and incremental process oriented toward the long term.                                                         | The sustainability framework or definition is based on sustainability-related practices and implementation conditions, with attention to economic, social, and environmental concerns.                                    | Main productive sector(s): food and beverage systems.                                                                                                      | Qualitative themes used in the synthesis include ISO 31000 risk management, with emphasis on sustainability integration, implementation conditions, and managerial implications.                                                                                                     | Variables or factors considered include digital technologies and data-driven practices, especially those affecting implementation, performance, risk, value, and sustainability outcomes.                                                                    | The link with project management is established through risk management, showing how sustainability reshapes planning, implementation, monitoring, control, or success criteria.                                                                                                   | The evidence addresses social dimension, environmental dimension, and economic dimension, even when no formal TBL label is used.                  | The key meta-aggregable finding is that digital technologies and data-driven practices requires changes in governance, decision criteria, project practices, or stakeholder coordination to strengthen sustainable outcomes.                                                                                 |
| 12 | Rodríguez-Rivero, R.; Ortiz-Marcos, I.; Romero, J.; Ballesteros-Sánchez, L. Finding the Links between Risk Management and Project Success: Evidence from International Development Projects in Colombia. Sustainability 2020, 12, 9294; doi:10.3390/su12209294.                                                                    | The article defines sustainability as meeting needs while respecting the environment.                                                                                                       | The sustainability framework or definition is based on digital technologies and data-driven practices, with attention to economic, social, and environmental concerns.                                                    | Main productive sector(s): cross-sectoral productive contexts.                                                                                             | Qualitative themes used in the synthesis include digital technologies and data-driven practices, with emphasis on sustainability integration, implementation conditions, and managerial implications.                                                                                | Variables or factors considered include social dimension, environmental dimension, economic dimension, and digital technologies and data-driven practices, especially those affecting implementation, performance, risk, value, and sustainability outcomes. | The link with project management is established through life-cycle perspective, showing how sustainability reshapes planning, implementation, monitoring, control, or success criteria.                                                                                            | The evidence addresses social dimension, environmental dimension, and economic dimension, even when no formal TBL label is used.                  | The key meta-aggregable finding is that project success criteria requires changes in governance, decision criteria, project practices, or stakeholder coordination to strengthen sustainable outcomes.                                                                                                       |
| 13 | Salvioni, D. M.; Almici, A. Transitioning Toward a Circular Economy: The Impact of Stakeholder Engagement on Sustainability Culture. Sustainability 2020, 12, 8641. doi:10.3390/su12208641.                                                                                                                                        | Sustainability is framed as the concurrent improvement of economic, social, and environmental dimensions.                                                                                   | The sustainability framework or definition is based on social dimension, environmental dimension, economic dimension, and digital technologies and data-driven practices, with                                            | Main productive sector(s): energy, logistics and supply chain, and transport infrastructure.                                                               | Qualitative themes used in the synthesis include GRI reporting standards, and digital technologies and data-driven practices, with emphasis on sustainability integration,                                                                                                           | Variables or factors considered include circular economy, and digital technologies and data-driven practices, especially those affecting implementation, performance, risk,                                                                                  | The link with project management is established through stakeholder engagement, showing how sustainability reshapes planning, implementation, monitoring, control, or                                                                                                              | The evidence addresses social dimension, environmental dimension, and economic dimension, even when no formal TBL label is used.                  | The key meta-aggregable finding is that circular economy, stakeholder engagement, low-carbon transition, and digital technologies and data-driven practices requires changes in                                                                                                                              |

| ID | Reference (Author, Year, DOI)                                                                                                                                                                                                                                                                                                                                                    | Main Research Aim                                                                                                                                                                                                                                          | Sustainability Framework / Definition                                                                                                                                                                                                                                              | Productive Sector(s)                                                                                                                 | Qualitative Themes (used in synthesis)                                                                                                                                                                                                                          | Quantitative Variables / Factors                                                                                                                                                                                                                                                  | Link with Project Management                                                                                                                                                                                                    | TBL / ESG Criteria Applied                                                                                                                         | Key Meta-Aggregable Finding                                                                                                                                                                                                                                                                  |
|----|----------------------------------------------------------------------------------------------------------------------------------------------------------------------------------------------------------------------------------------------------------------------------------------------------------------------------------------------------------------------------------|------------------------------------------------------------------------------------------------------------------------------------------------------------------------------------------------------------------------------------------------------------|------------------------------------------------------------------------------------------------------------------------------------------------------------------------------------------------------------------------------------------------------------------------------------|--------------------------------------------------------------------------------------------------------------------------------------|-----------------------------------------------------------------------------------------------------------------------------------------------------------------------------------------------------------------------------------------------------------------|-----------------------------------------------------------------------------------------------------------------------------------------------------------------------------------------------------------------------------------------------------------------------------------|---------------------------------------------------------------------------------------------------------------------------------------------------------------------------------------------------------------------------------|----------------------------------------------------------------------------------------------------------------------------------------------------|----------------------------------------------------------------------------------------------------------------------------------------------------------------------------------------------------------------------------------------------------------------------------------------------|
|    |                                                                                                                                                                                                                                                                                                                                                                                  |                                                                                                                                                                                                                                                            | attention to social dimension, environmental dimension, and economic dimension.                                                                                                                                                                                                    |                                                                                                                                      | implementation conditions, and managerial implications.                                                                                                                                                                                                         | value, and sustainability outcomes.                                                                                                                                                                                                                                               | success criteria.                                                                                                                                                                                                               |                                                                                                                                                    | governance, decision criteria, project practices, or stakeholder coordination to strengthen sustainable outcomes.                                                                                                                                                                            |
| 14 | Sustainability in project risk management methodologies through the AHP-TOPSIS method applied to logistics and supply chain management — Patricia Navascués Vega; Urtzi Llano Castresana. Environmental and Sustainability Indicators 26 (2025) 100719. <a href="https://doi.org/10.1016/j.indic.2025.100719">https://doi.org/10.1016/j.indic.2025.100719</a> .                  | The article defines sustainability as process optimization that considers environmental, social, and governance dimensions.                                                                                                                                | The sustainability framework or definition is based on governance, social dimension, environmental dimension, and digital technologies and data-driven practices, with attention to social dimension, and environmental dimension.                                                 | Main productive sector(s): information technology and digital services, and logistics and supply chain.                              | Qualitative themes used in the synthesis include ESG, PMBOK knowledge areas, PRINCE2, risk management, and digital technologies and data-driven practices, with emphasis on sustainability integration, implementation conditions, and managerial implications. | Variables or factors considered include ESG, risk management, and digital technologies and data-driven practices, especially those affecting implementation, performance, risk, value, and sustainability outcomes.                                                               | The link with project management is established through risk management, showing how sustainability reshapes planning, implementation, monitoring, control, or success criteria.                                                | TBL criteria are explicitly addressed through economic, social, and environmental dimensions.                                                      | The key meta-aggregable finding is that sustainability-related practices and implementation conditions requires changes in governance, decision criteria, project practices, or stakeholder coordination to strengthen sustainable outcomes.                                                 |
| 15 | Dounavi, L.-E.; Dermitzakis, E.; Chatzistelios, G.; Kiriopoulos, K. Project Management for Corporate Events: A Set of Tools to Manage Risk and Increase Quality Outcomes. Sustainability 2022, 14, 2009. <a href="https://doi.org/10.3390/su14042009">https://doi.org/10.3390/su14042009</a> .                                                                                   | The article does not provide a single formal sustainability definition; it examines ESG, social dimension, environmental dimension, economic dimension, and digital technologies and data-driven practices in information technology and digital services. | No single formal definition of sustainability is reported; the article frames the concept through digital technologies and data-driven practices.                                                                                                                                  | Main productive sector(s): food and beverage systems, transport infrastructure, and events and tourism.                              | Qualitative themes used in the synthesis include digital technologies and data-driven practices, with emphasis on sustainability integration, implementation conditions, and managerial implications.                                                           | Variables or factors considered include digital technologies and data-driven practices, especially those affecting implementation, performance, risk, value, and sustainability outcomes.                                                                                         | The link with project management is established through risk management, and quality outcomes, showing how sustainability reshapes planning, implementation, monitoring, control, or success criteria.                          | ESG criteria are explicitly addressed, including environmental, social, and governance concerns and their managerial or performance implications.  | The key meta-aggregable finding is that sustainability-related practices and implementation conditions requires changes in governance, decision criteria, project practices, or stakeholder coordination to strengthen sustainable outcomes.                                                 |
| 16 | Bai, L.; Li, Y.; Du, Q.; Xu, Y. A Fuzzy Comprehensive Evaluation Model for Sustainability Risk Evaluation of PPP Projects. Sustainability 2017, 9, 1890. doi:10.3390/su9101890.                                                                                                                                                                                                  | The article defines sustainability risk as the combination of the probability and consequences of events that affect organizational sustainable development.                                                                                               | The sustainability framework or definition is based on Triple Bottom Line, and digital technologies and data-driven practices, with attention to economic, social, and environmental concerns.                                                                                     | Main productive sector(s): PPP infrastructure projects.                                                                              | Qualitative themes used in the synthesis include digital technologies and data-driven practices, with emphasis on sustainability integration, implementation conditions, and managerial implications.                                                           | Variables or factors considered include digital technologies and data-driven practices, especially those affecting implementation, performance, risk, value, and sustainability outcomes.                                                                                         | The link with project management is established through risk management, and quality outcomes, showing how sustainability reshapes planning, implementation, monitoring, control, or success criteria.                          | TBL criteria are explicitly addressed through economic, social, and environmental dimensions.                                                      | The key meta-aggregable finding is that ESG, risk management, financial performance and investment, and digital technologies and data-driven practices requires changes in governance, decision criteria, project practices, or stakeholder coordination to strengthen sustainable outcomes. |
| 17 | Gładysz, B.; Kuchta, D. Sustainable Metrics in Project Financial Risk Management. Sustainability 2022, 14, 14247. <a href="https://doi.org/10.3390/su142114247">https://doi.org/10.3390/su142114247</a> .                                                                                                                                                                        | The article defines sustainability through six principles, including social-environmental-economic balance and short- and long-term orientation.                                                                                                           | The sustainability framework or definition is based on digital technologies and data-driven practices, with attention to economic, social, and environmental concerns.                                                                                                             | Main productive sector(s): cross-sectoral productive contexts.                                                                       | Qualitative themes used in the synthesis include sustainability-related practices and implementation conditions, with emphasis on sustainability integration, implementation conditions, and managerial implications.                                           | Variables or factors considered include ESG, risk management, stakeholder engagement, financial performance and investment, and digital technologies and data-driven practices, especially those affecting implementation, performance, risk, value, and sustainability outcomes. | The link with project management is established through sustainability-related practices and implementation conditions, showing how sustainability reshapes planning, implementation, monitoring, control, or success criteria. | ESG criteria are explicitly addressed, including environmental, social, and governance concerns and their managerial or performance implications.  | The key meta-aggregable finding is that risk management, financial performance and investment, and digital technologies and data-driven practices requires changes in governance, decision criteria, project practices, or stakeholder coordination to strengthen sustainable outcomes.      |
| 18 | Doskočil, R., & Lacko, B. Risk Management and Knowledge Management as Critical Success Factors of Sustainability Projects. Sustainability, 2018, 10, 1438; doi:10.3390/su10051438.                                                                                                                                                                                               | The article links sustainable development to the achievement of the 17 Sustainable Development Goals and argues that project management is a means to achieve them.                                                                                        | The sustainability framework or definition is based on SDGs/2030 Agenda, and digital technologies and data-driven practices, with attention to economic, social, and environmental concerns.                                                                                       | Main productive sector(s): construction and infrastructure, energy, and information technology and digital services.                 | Qualitative themes used in the synthesis include digital technologies and data-driven practices, with emphasis on sustainability integration, implementation conditions, and managerial implications.                                                           | Variables or factors considered include digital technologies and data-driven practices, especially those affecting implementation, performance, risk, value, and sustainability outcomes.                                                                                         | The link with project management is established through sustainability-related practices and implementation conditions, showing how sustainability reshapes planning, implementation, monitoring, control, or success criteria. | The evidence addresses economic dimension, even when no formal TBL label is used.                                                                  | The key meta-aggregable finding is that ISO project management guidance requires changes in governance, decision criteria, project practices, or stakeholder coordination to strengthen sustainable outcomes.                                                                                |
| 19 | Keleş, A.E.; Gülek, G.G.; Górecki, J. Use of Project Management Knowledge Areas in Civil Infrastructure Projects: Implications for Sustainability Assessment and Risk Analysis. Sustainability 2025, 17, 9129. <a href="https://doi.org/10.3390/su17209129">https://doi.org/10.3390/su17209129</a> .                                                                             | Sustainability in construction is presented as a holistic approach that includes environmental, social, and economic dimensions, as well as technical suitability.                                                                                         | The sustainability framework or definition is based on social dimension, environmental dimension, economic dimension, and digital technologies and data-driven practices, with attention to social dimension, environmental dimension, and economic dimension.                     | Main productive sector(s): construction and infrastructure.                                                                          | Qualitative themes used in the synthesis include PMBOK knowledge areas, with emphasis on sustainability integration, implementation conditions, and managerial implications.                                                                                    | Variables or factors considered include financial performance and investment, and digital technologies and data-driven practices, especially those affecting implementation, performance, risk, value, and sustainability outcomes.                                               | The link with project management is established through PMBOK knowledge areas, showing how sustainability reshapes planning, implementation, monitoring, control, or success criteria.                                          | The evidence addresses social dimension, environmental dimension, and economic dimension, even when no formal TBL label is used.                   | The key meta-aggregable finding is that digital technologies and data-driven practices requires changes in governance, decision criteria, project practices, or stakeholder coordination to strengthen sustainable outcomes.                                                                 |
| 20 | Uribe, D. F.; Ortiz-Marcos, I.; Uruburu, Á. What Is Going on with Stakeholder Theory in Project Management Literature? A Symbiotic Relationship for Sustainability. Sustainability 2018, 10, 1300. doi:10.3390/su10041300.                                                                                                                                                       | The article conceptualizes sustainability as a balance between economic activity and social and environmental impacts.                                                                                                                                     | The sustainability framework or definition is based on economic dimension, with attention to economic dimension.                                                                                                                                                                   | Main productive sector(s): information technology and digital services, and public administration.                                   | Qualitative themes used in the synthesis include digital technologies and data-driven practices, with emphasis on sustainability integration, implementation conditions, and managerial implications.                                                           | Variables or factors considered include governance, and digital technologies and data-driven practices, especially those affecting implementation, performance, risk, value, and sustainability outcomes.                                                                         | The link with project management is established through digital technologies and data-driven practices, showing how sustainability reshapes planning, implementation, monitoring, control, or success criteria.                 | The evidence addresses social dimension, environmental dimension, and economic dimension, even when no formal TBL label is used.                   | The key meta-aggregable finding is that environmental dimension, and digital technologies and data-driven practices requires changes in governance, decision criteria, project practices, or stakeholder coordination to strengthen sustainable outcomes.                                    |
| 21 | Blak Bernat, G.; Qualharini, E.L.; Castro, M.S. Enhancing Sustainability in Project Management: The Role of Stakeholder Engagement and Knowledge Management in Virtual Team Environments. Sustainability 2023, 15, 4896. <a href="https://doi.org/10.3390/su15064896">https://doi.org/10.3390/su15064896</a> .                                                                   | The article frames sustainability in project management through the Triple Bottom Line: economic, environmental, and social dimensions.                                                                                                                    | The sustainability framework or definition is based on Triple Bottom Line, social dimension, environmental dimension, economic dimension, and digital technologies and data-driven practices, with attention to social dimension, environmental dimension, and economic dimension. | Main productive sector(s): construction and infrastructure, manufacturing, and information technology and digital services.          | Qualitative themes used in the synthesis include Triple Bottom Line, and life-cycle perspective, with emphasis on sustainability integration, implementation conditions, and managerial implications.                                                           | Variables or factors considered include social dimension, environmental dimension, economic dimension, and digital technologies and data-driven practices, especially those affecting implementation, performance, risk, value, and sustainability outcomes.                      | The link with project management is established through project success criteria, showing how sustainability reshapes planning, implementation, monitoring, control, or success criteria.                                       | The evidence addresses social dimension, and economic dimension, even when no formal TBL label is used.                                            | The key meta-aggregable finding is that stakeholder engagement, and project success criteria requires changes in governance, decision criteria, project practices, or stakeholder coordination to strengthen sustainable outcomes.                                                           |
| 22 | Santos, M.P. et al. (2023). Bridging External Stakeholders and Sustainability Literature: a review looking at a project management context, Brazilian Journal of Operations & Production Management, Vol. 20, No. 3 special edition, e20231243. <a href="https://doi.org/10.14488/BJOPM.1243.2023">https://doi.org/10.14488/BJOPM.1243.2023</a> .                                | The article defines project sustainability through the TBL framework, integrating economic, social, and environmental dimensions.                                                                                                                          | The sustainability framework or definition is based on Triple Bottom Line, with attention to economic, social, and environmental concerns.                                                                                                                                         | Main productive sector(s): construction and infrastructure.                                                                          | Qualitative themes used in the synthesis include Triple Bottom Line, and digital technologies and data-driven practices, with emphasis on sustainability integration, implementation conditions, and managerial implications.                                   | Variables or factors considered include stakeholder engagement, and digital technologies and data-driven practices, especially those affecting implementation, performance, risk, value, and sustainability outcomes.                                                             | The link with project management is established through stakeholder engagement, showing how sustainability reshapes planning, implementation, monitoring, control, or success criteria.                                         | TBL criteria are explicitly addressed through economic, social, and environmental dimensions.                                                      | The key meta-aggregable finding is that sustainability-related practices and implementation conditions requires changes in governance, decision criteria, project practices, or stakeholder coordination to strengthen sustainable outcomes.                                                 |
| 23 | Marcia de Almeida Vittori Ferreira; Claudia do Rosario Vaz Morgado; Marcos Pereira Estellita Lins. Organizations and stakeholders' roles and influence on implementing sustainability requirements in construction projects. Heliyon 10 (2024) e23762.                                                                                                                           | The study adopts a definition of sustainable project management that integrates the Triple Bottom Line throughout the project life cycle.                                                                                                                  | The sustainability framework or definition is based on Triple Bottom Line, life-cycle perspective, and digital technologies and data-driven practices, with attention to economic, social, and environmental concerns.                                                             | Main productive sector(s): construction and infrastructure, energy, information technology and digital services, and mining.         | Qualitative themes used in the synthesis include Triple Bottom Line, and digital technologies and data-driven practices, with emphasis on sustainability integration, implementation conditions, and managerial implications.                                   | Variables or factors considered include governance, and digital technologies and data-driven practices, especially those affecting implementation, performance, risk, value, and sustainability outcomes.                                                                         | The link with project management is established through digital technologies and data-driven practices, showing how sustainability reshapes planning, implementation, monitoring, control, or success criteria.                 | TBL criteria are explicitly addressed through economic, social, and environmental dimensions.                                                      | The key meta-aggregable finding is that Triple Bottom Line, quality outcomes, time performance, and cost/budget performance requires changes in governance, decision criteria, project practices, or stakeholder coordination to strengthen sustainable outcomes.                            |
| 24 | Krechowicz, M. Towards Sustainable Project Management: Evaluation of Relationship-Specific Risks and Risk Determinants Threatening to Achieve the Intended Benefit of Interorganizational Cooperation in Engineering Projects. Sustainability 2022, 14, 2961. <a href="https://doi.org/10.3390/su14052961">https://doi.org/10.3390/su14052961</a> .                              | The article defines SPM as the integration of environmental, economic, and social life-cycle dimensions into project planning, monitoring, and control.                                                                                                    | The sustainability framework or definition is based on digital technologies and data-driven practices, with attention to economic, social, and environmental concerns.                                                                                                             | Main productive sector(s): construction and infrastructure, information technology and digital services, and corporate CSR programs. | Qualitative themes used in the synthesis include digital technologies and data-driven practices, with emphasis on sustainability integration, implementation conditions, and managerial implications.                                                           | Variables or factors considered include ESG, risk management, and digital technologies and data-driven practices, especially those affecting implementation, performance, risk, value, and sustainability outcomes.                                                               | The link with project management is established through digital technologies and data-driven practices, showing how sustainability reshapes planning, implementation, monitoring, control, or success criteria.                 | The evidence addresses social dimension, environmental dimension, and economic dimension, even when no formal TBL label is used.                   | The key meta-aggregable finding is that governance requires changes in governance, decision criteria, project practices, or stakeholder coordination to strengthen sustainable outcomes.                                                                                                     |
| 25 | Pacillo, G., Nguyen, N., Paustyan, E., Cavatassi, R., Astralaga, M., & Läderach, P. (2024). What drives the success and failure of climate change adaptation projects? A qualitative comparative analysis. Mitigation and Adaptation Strategies for Global Change, 29(89). <a href="https://doi.org/10.1007/s11027-024-10186-6">https://doi.org/10.1007/s11027-024-10186-6</a> . | The article does not explicitly define sustainability; instead, it integrates it within a multidimensional climate resilience framework.                                                                                                                   | No single formal definition of sustainability is reported; the article frames the concept through climate resilience/adaptation, and digital technologies and data-driven practices.                                                                                               | Main productive sector(s): agriculture.                                                                                              | Qualitative themes used in the synthesis include climate resilience/adaptation, and digital technologies and data-driven practices, with emphasis on sustainability integration, implementation conditions, and managerial implications.                        | Variables or factors considered include climate resilience/adaptation, digital technologies and data-driven practices, and qualitative comparative analysis, especially those affecting implementation, performance, risk, value, and sustainability outcomes.                    | The link with project management is established through digital technologies and data-driven practices, showing how sustainability reshapes planning, implementation, monitoring, control, or success criteria.                 | The article does not use TBL as a formal assessment framework, but it addresses social dimension, environmental dimension, and economic dimension. | The key meta-aggregable finding is that project success criteria, cost/budget performance, and digital technologies and data-driven practices requires changes in governance, decision criteria, project practices, or stakeholder coordination to strengthen sustainable outcomes.          |
| 26 | Axelsson, R., Ljung, M., Blicharska, M., Frisk, M., Henningssson, M., Mikusiński, G., Folkeson, L., Göransson, G., Jönsson-Ekström, S., Sjölund, A., Skoog, J., Törnblom, J., & Angelstam, P. (2020). The Challenge of Transdisciplinary Research: A Case Study of Learning by Evaluation for Sustainable Transport Infrastructures. Sustainability, 12, 6995.                   | Sustainability is understood as a societal process oriented toward the sustainability of socio-ecological systems and landscapes.                                                                                                                          | The sustainability framework or definition is based on digital technologies and data-driven practices, with attention to economic, social, and environmental concerns.                                                                                                             | Main productive sector(s): information technology and digital services, and transport infrastructure.                                | Qualitative themes used in the synthesis include digital technologies and data-driven practices, and transdisciplinary research, with emphasis on sustainability integration, implementation conditions, and managerial implications.                           | Variables or factors considered include digital technologies and data-driven practices, especially those affecting implementation, performance, risk, value, and sustainability outcomes.                                                                                         | The link with project management is established through digital technologies and data-driven practices, showing how sustainability reshapes planning, implementation, monitoring, control, or success criteria.                 | TBL criteria are explicitly addressed through economic, social, and environmental dimensions.                                                      | The key meta-aggregable finding is that digital technologies and data-driven practices requires changes in governance, decision criteria, project practices, or stakeholder coordination to strengthen sustainable outcomes.                                                                 |
| 27 | Sabini, L., Alderman, N., & Klakegg, O. J. (2021). Sustainability in project management: A literature review. International Journal of Project Management, 39(6), 745–760. <a href="https://doi.org/10.1016/j.jiproman.2021.03.004">https://doi.org/10.1016/j.jiproman.2021.03.004</a> .                                                                                         | There is no single agreed definition of sustainability in project management.                                                                                                                                                                              | The sustainability framework or definition is based on digital technologies and data-driven practices, with attention to economic, social, and                                                                                                                                     | Main productive sector(s): construction and energy.                                                                                  | Qualitative themes used in the synthesis include sustainability-related practices and implementation conditions, with emphasis on sustainability integration,                                                                                                   | Variables or factors considered include digital technologies and data-driven practices, especially those affecting implementation, performance, risk,                                                                                                                             | The link with project management is established through project success criteria, showing how sustainability reshapes planning, implementation,                                                                                 | TBL criteria are explicitly addressed through economic, social, and environmental dimensions.                                                      | The key meta-aggregable finding is that project success criteria requires changes in governance, decision criteria, project practices, or stakeholder                                                                                                                                        |

| ID | Reference (Author, Year, DOI)                                                                                                                                                                                                                                                                                                                                                                                     | Main Research Aim                                                                                                                                                                                         | Sustainability Framework / Definition                                                                                                                                                                                                                          | Productive Sector(s)                                                                                                               | Qualitative Themes (used in synthesis)                                                                                                                                                                                                                  | Quantitative Variables / Factors                                                                                                                                                                                                                                                      | Link with Project Management                                                                                                                                                                                                                  | TBL / ESG Criteria Applied                                                                                                                        | Key Meta-Aggregable Finding                                                                                                                                                                                                                                                                               |
|----|-------------------------------------------------------------------------------------------------------------------------------------------------------------------------------------------------------------------------------------------------------------------------------------------------------------------------------------------------------------------------------------------------------------------|-----------------------------------------------------------------------------------------------------------------------------------------------------------------------------------------------------------|----------------------------------------------------------------------------------------------------------------------------------------------------------------------------------------------------------------------------------------------------------------|------------------------------------------------------------------------------------------------------------------------------------|---------------------------------------------------------------------------------------------------------------------------------------------------------------------------------------------------------------------------------------------------------|---------------------------------------------------------------------------------------------------------------------------------------------------------------------------------------------------------------------------------------------------------------------------------------|-----------------------------------------------------------------------------------------------------------------------------------------------------------------------------------------------------------------------------------------------|---------------------------------------------------------------------------------------------------------------------------------------------------|-----------------------------------------------------------------------------------------------------------------------------------------------------------------------------------------------------------------------------------------------------------------------------------------------------------|
|    |                                                                                                                                                                                                                                                                                                                                                                                                                   |                                                                                                                                                                                                           | environmental concerns.                                                                                                                                                                                                                                        |                                                                                                                                    | implementation conditions, and managerial implications.                                                                                                                                                                                                 | value, and sustainability outcomes.                                                                                                                                                                                                                                                   | monitoring, control, or success criteria.                                                                                                                                                                                                     |                                                                                                                                                   | coordination to strengthen sustainable outcomes.                                                                                                                                                                                                                                                          |
| 28 | Blix Germundsson, L., Papadopoulou, E., Jönsson, H., Dimitrievski, I., Moudry, J., & Melin, M. (2024). Participatory ex-ante impact assessment for interactive research and development in agriculture and food systems. <i>Impact Assessment and Project Appraisal</i> , 42(2), 160–172. <a href="https://doi.org/10.1080/14615517.2024.2330792">https://doi.org/10.1080/14615517.2024.2330792</a> .             | Sustainability is addressed as a multidimensional concept that integrates economic, environmental, and social dimensions.                                                                                 | The sustainability framework or definition is based on social dimension, environmental dimension, economic dimension, and digital technologies and data-driven practices, with attention to social dimension, environmental dimension, and economic dimension. | Main productive sector(s): information technology and digital services, and agriculture.                                           | Qualitative themes used in the synthesis include economic dimension, and participatory assessment, with emphasis on sustainability integration, implementation conditions, and managerial implications.                                                 | Variables or factors considered include digital technologies and data-driven practices, especially those affecting implementation, performance, risk, value, and sustainability outcomes.                                                                                             | The link with project management is established through digital technologies and data-driven practices, and participatory assessment, showing how sustainability reshapes planning, implementation, monitoring, control, or success criteria. | TBL criteria are explicitly addressed through economic, social, and environmental dimensions.                                                     | The key meta-aggregable finding is that digital technologies and data-driven practices requires changes in governance, decision criteria, project practices, or stakeholder coordination to strengthen sustainable outcomes.                                                                              |
| 29 | Raturi, A., Thompson, J. J., Ackroyd, V., Chase, C. A., Davis, B. W., Myers, R., Poncet, A., Ramos-Giraldo, P., Reberg-Horton, C., Rejesus, R., Robertson, A., Ruark, M. D., Seehaver-Eagen, S., & Mirsky, S. (2022). Cultivating trust in technology-mediated sustainable agricultural research. <i>Agronomy Journal</i> , 114, 2669–2680. <a href="https://doi.org/10.1002/ag">https://doi.org/10.1002/ag</a> . | Sustainable agriculture is presented as information-intensive and requiring data exchange among multiple actors.                                                                                          | The sustainability framework or definition is based on GRI reporting standards, with attention to economic, social, and environmental concerns.                                                                                                                | Main productive sector(s): information technology and digital services, and agriculture.                                           | Qualitative themes used in the synthesis include GRI reporting standards, and trust in technology-mediated research, with emphasis on sustainability integration, implementation conditions, and managerial implications.                               | Variables or factors considered include digital technologies and data-driven practices, and trust in technology-mediated research, especially those affecting implementation, performance, risk, value, and sustainability outcomes.                                                  | The link with project management is established through governance, showing how sustainability reshapes planning, implementation, monitoring, control, or success criteria.                                                                   | The article does not use TBL as a formal assessment framework, but it addresses economic dimension.                                               | The key meta-aggregable finding is that GRI reporting standards requires changes in governance, decision criteria, project practices, or stakeholder coordination to strengthen sustainable outcomes.                                                                                                     |
| 30 | Avadi, A., Cole, S. M., Kruijssen, F., Dabat, M.-H., & Mungule, C. M. (2022). How to enhance the sustainability and inclusiveness of smallholder aquaculture production systems in Zambia? <i>Aquaculture</i> , 547, 737494. <a href="https://doi.org/10.1016/j.aquaculture.2021.737494">https://doi.org/10.1016/j.aquaculture.2021.737494</a> .                                                                  | Chain sustainability and inclusiveness are defined as equitable benefits for resource-poor actors without excessive environmental pressure.                                                               | The sustainability framework or definition is based on social dimension, economic dimension, and digital technologies and data-driven practices, with attention to social dimension, and economic dimension.                                                   | Main productive sector(s): agriculture, and aquaculture and fisheries.                                                             | Qualitative themes used in the synthesis include economic dimension, with emphasis on sustainability integration, implementation conditions, and managerial implications.                                                                               | Variables or factors considered include financial performance and investment, quality outcomes, and digital technologies and data-driven practices, especially those affecting implementation, performance, risk, value, and sustainability outcomes.                                 | A direct connection with formal project management standards or life-cycle processes is not explicitly reported.                                                                                                                              | The evidence addresses social dimension, environmental dimension, and economic dimension, even when no formal TBL label is used.                  | The key meta-aggregable finding is that financial performance and investment, and digital technologies and data-driven practices requires changes in governance, decision criteria, project practices, or stakeholder coordination to strengthen sustainable outcomes.                                    |
| 31 | Stone, A. G., Treadwell, D. D., Formiga, A. K., McQueen, J. P. G., Wander, M. M., Riddle, J., Darby, H. M., & Heleba, D. (2012). eOrganic: The Organic Agriculture Community of Practice for eXtension. <i>HortTechnology</i> , 22(5), 583–588.                                                                                                                                                                   | eOrganic is a national organic agriculture community of practice that uses web technologies to synthesize emerging science, existing information, and practical knowledge.                                | The sustainability framework or definition is based on GRI reporting standards, with attention to economic, social, and environmental concerns.                                                                                                                | Main productive sector(s): agriculture.                                                                                            | Qualitative themes used in the synthesis include GRI reporting standards, with emphasis on sustainability integration, implementation conditions, and managerial implications.                                                                          | Variables or factors considered include time performance, especially those affecting implementation, performance, risk, value, and sustainability outcomes.                                                                                                                           | The link with project management is established through digital technologies and data-driven practices, showing how sustainability reshapes planning, implementation, monitoring, control, or success criteria.                               | TBL criteria are explicitly addressed through economic, social, and environmental dimensions.                                                     | The key meta-aggregable finding is that digital technologies and data-driven practices requires changes in governance, decision criteria, project practices, or stakeholder coordination to strengthen sustainable outcomes.                                                                              |
| 32 | Shamshiri RR, Sturm B, Weltzien C, Fulton J, Khosla R, Schirmann M, Raut S, Basavegowda DH, Yamin M and Hameed IA (2024), Digitalization of agriculture for sustainable crop production: a use-case review. <i>Front. Environ. Sci.</i> 12:1375193. doi: 10.3389/fenvs.2024.1375193.                                                                                                                              | Agricultural digitalization is associated with real-time monitoring and management that improves yields and reduces waste.                                                                                | The sustainability framework or definition is based on digital technologies and data-driven practices, with attention to economic, social, and environmental concerns.                                                                                         | Main productive sector(s): food and beverage systems, and agriculture.                                                             | Qualitative themes used in the synthesis include Triple Bottom Line, ESG, SDGs/2030 Agenda, and digital technologies and data-driven practices, with emphasis on sustainability integration, implementation conditions, and managerial implications.    | Variables or factors considered include financial performance and investment, and digital technologies and data-driven practices, especially those affecting implementation, performance, risk, value, and sustainability outcomes.                                                   | The link with project management is established through sustainability-related practices and implementation conditions, showing how sustainability reshapes planning, implementation, monitoring, control, or success criteria.               | The evidence addresses economic dimension, even when no formal TBL label is used.                                                                 | The key meta-aggregable finding is that sustainability-related practices and implementation conditions requires changes in governance, decision criteria, project practices, or stakeholder coordination to strengthen sustainable outcomes.                                                              |
| 33 | Martos, V.; Ahmad, A.; Cartujo, P.; Ordoñez, J. Ensuring Agricultural Sustainability through Remote Sensing in the Era of Agriculture 5.0. <i>Appl. Sci.</i> 2021, 11, 5911.                                                                                                                                                                                                                                      | Sustainability is formulated as sustainable agriculture linked to food security and the achievement of the SDGs, especially SDG 2: Zero Hunger.                                                           | The sustainability framework or definition is based on SDGs/2030 Agenda, GRI reporting standards, and digital technologies and data-driven practices, with attention to economic, social, and environmental concerns.                                          | Main productive sector(s): agriculture.                                                                                            | Qualitative themes used in the synthesis include SDGs/2030 Agenda, GRI reporting standards, and digital technologies and data-driven practices, with emphasis on sustainability integration, implementation conditions, and managerial implications.    | Variables or factors considered include cost/budget performance, and digital technologies and data-driven practices, especially those affecting implementation, performance, risk, value, and sustainability outcomes.                                                                | The link with project management is established through sustainability-related practices and implementation conditions, showing how sustainability reshapes planning, implementation, monitoring, control, or success criteria.               | TBL criteria are explicitly addressed through economic, social, and environmental dimensions.                                                     | The key meta-aggregable finding is that GRI reporting standards, and digital technologies and data-driven practices requires changes in governance, decision criteria, project practices, or stakeholder coordination to strengthen sustainable outcomes.                                                 |
| 34 | Hajjalani, S., Rostami, F., Ahmadvand, M., Mirakzadeh, A.A., & Azadi, H. Assessment of effect size and social indicators sustainability in the context of international rural development projects in Iran: Using BACI framework. <i>Environmental and Sustainability Indicators</i> , 27 (2025) 100871. <a href="https://doi.org/10.1016/j.indic.2025.100871">https://doi.org/10.1016/j.indic.2025.100871</a> .  | The article defines sustainability as integrating environmental, economic, and social dimensions and positions social sustainability as a dimension of sustainable development.                           | The sustainability framework or definition is based on social dimension, environmental dimension, economic dimension, and digital technologies and data-driven practices, with attention to social dimension, environmental dimension, and economic dimension. | Main productive sector(s): information technology and digital services, and rural development.                                     | Qualitative themes used in the synthesis include sustainability-related practices and implementation conditions, with emphasis on sustainability integration, implementation conditions, and managerial implications.                                   | Variables or factors considered include social dimension, and digital technologies and data-driven practices, especially those affecting implementation, performance, risk, value, and sustainability outcomes.                                                                       | The link with project management is established through social dimension, and digital technologies and data-driven practices, showing how sustainability reshapes planning, implementation, monitoring, control, or success criteria.         | The evidence addresses social dimension, environmental dimension, and economic dimension, even when no formal TBL label is used.                  | The key meta-aggregable finding is that sustainability-related practices and implementation conditions requires changes in governance, decision criteria, project practices, or stakeholder coordination to strengthen sustainable outcomes.                                                              |
| 35 | Thomann, Jason A., Werner, Adrian D., Irvine, Dylan J., & Currell, Matthew J. Adaptive management in groundwater planning and development: A review of theory and applications. <i>Journal of Hydrology (Accepted Manuscript)</i> . DOI: 10.1016/j.jhydrol.2020.124871.                                                                                                                                           | Groundwater management requires balancing human demands, future water security, and the requirements of groundwater-dependent ecosystems.                                                                 | No single formal definition of sustainability is reported; the article frames the concept through digital technologies and data-driven practices.                                                                                                              | Main productive sector(s): energy, agriculture, and mining.                                                                        | Qualitative themes used in the synthesis include digital technologies and data-driven practices, with emphasis on sustainability integration, implementation conditions, and managerial implications.                                                   | Variables or factors considered include digital technologies and data-driven practices, especially those affecting implementation, performance, risk, value, and sustainability outcomes.                                                                                             | A direct connection with formal project management standards or life-cycle processes is not explicitly reported.                                                                                                                              | TBL criteria are explicitly addressed through economic, social, and environmental dimensions.                                                     | The key meta-aggregable finding is that digital technologies and data-driven practices requires changes in governance, decision criteria, project practices, or stakeholder coordination to strengthen sustainable outcomes.                                                                              |
| 36 | Caffi, T.; Helsen, H.H.M.; Rossi, V.; Holb, I.J.; Strassemer, J.; Buurma, J.S.; Capowiez, Y.; Simon, S.; Alaphilippe, A. Multicriteria evaluation of innovative IPM systems in pome fruit in Europe. <i>Crop Protection</i> (2016) 1–8. <a href="http://dx.doi.org/10.1016/j.cropro.2016.12.009">http://dx.doi.org/10.1016/j.cropro.2016.12.009</a> .                                                             | Directive 2009/128/EC establishes rules for the sustainable use of pesticides to reduce risks and impacts on human health and the environment, promoting low-use strategies.                              | The sustainability framework or definition is based on ESG, and risk management, with attention to economic, social, and environmental concerns.                                                                                                               | Main productive sector(s): information technology and digital services, and agriculture.                                           | Qualitative themes used in the synthesis include digital technologies and data-driven practices, with emphasis on sustainability integration, implementation conditions, and managerial implications.                                                   | Variables or factors considered include sustainability-related practices and implementation conditions, especially those affecting implementation, performance, risk, value, and sustainability outcomes.                                                                             | The link with project management is established through GRI reporting standards, and digital technologies and data-driven practices, showing how sustainability reshapes planning, implementation, monitoring, control, or success criteria.  | ESG criteria are explicitly addressed, including environmental, social, and governance concerns and their managerial or performance implications. | The key meta-aggregable finding is that digital technologies and data-driven practices requires changes in governance, decision criteria, project practices, or stakeholder coordination to strengthen sustainable outcomes.                                                                              |
| 37 | Rodríguez Monroy, C.; San Segundo Hernández, A. Strengthening financial innovation in energy supply projects for rural communities in developing countries. <i>International Journal of Sustainable Development &amp; World Ecology</i> , 15 (2008) 1–13. DOI: 10.3843/SusDev.15.5.                                                                                                                               | Sustainable energy supply models are required to achieve the Millennium Development Goals linked to poverty reduction.                                                                                    | The sustainability framework or definition is based on financial performance and investment, and digital technologies and data-driven practices, with attention to economic, social, and environmental concerns.                                               | Main productive sector(s): information technology and digital services, and agriculture.                                           | Qualitative themes used in the synthesis include sustainability-related practices and implementation conditions, with emphasis on sustainability integration, implementation conditions, and managerial implications.                                   | Variables or factors considered include GRI reporting standards, financial performance and investment, cost/budget performance, and digital technologies and data-driven practices, especially those affecting implementation, performance, risk, value, and sustainability outcomes. | The link with project management is established through sustainability-related practices and implementation conditions, showing how sustainability reshapes planning, implementation, monitoring, control, or success criteria.               | The evidence addresses economic dimension, even when no formal TBL label is used.                                                                 | The key meta-aggregable finding is that digital technologies and data-driven practices requires changes in governance, decision criteria, project practices, or stakeholder coordination to strengthen sustainable outcomes.                                                                              |
| 38 | Sanyé-Mengual, Esther; Specht, Kathrin; Grapsa, Erofili; Orsini, Francesco; Gianquinto, Giorgio. How Can Innovation in Urban Agriculture Contribute to Sustainability? A Characterization and Evaluation Study from Five Western European Cities. <i>Sustainability</i> 2019, 11, 4221.                                                                                                                           | The article examines GRI reporting standards, and digital technologies and data-driven practices in agriculture, and urban agriculture, emphasizing its relevance for sustainability-oriented management. | The sustainability framework or definition is based on social dimension, environmental dimension, economic dimension, and digital technologies and data-driven practices, with attention to social dimension, environmental dimension, and economic dimension. | Main productive sector(s): agriculture, and urban agriculture.                                                                     | Qualitative themes used in the synthesis include digital technologies and data-driven practices, with emphasis on sustainability integration, implementation conditions, and managerial implications.                                                   | Variables or factors considered include sustainability-related practices and implementation conditions, especially those affecting implementation, performance, risk, value, and sustainability outcomes.                                                                             | A direct connection with formal project management standards or life-cycle processes is not explicitly reported.                                                                                                                              | ESG criteria are explicitly addressed, including environmental, social, and governance concerns and their managerial or performance implications. | The key meta-aggregable finding is that project success criteria, and digital technologies and data-driven practices requires changes in governance, decision criteria, project practices, or stakeholder coordination to strengthen sustainable outcomes.                                                |
| 39 | Zandi, P.; Rahmani, M.; Khanian, M.; Mosavi, A. Agricultural Risk Management Using Fuzzy TOPSIS Analytical Hierarchy Process (AHP) and Failure Mode and Effects Analysis (FMEA). <i>Agriculture</i> 2020, 10, 0504. DOI: 10.3390/agriculture10110504.                                                                                                                                                             | The article does not provide a single formal sustainability definition; it examines digital technologies and data-driven practices in information technology and digital services.                        | No single formal definition of sustainability is reported; the article frames the concept through digital technologies and data-driven practices.                                                                                                              | Main productive sector(s): information technology and digital services, and agriculture.                                           | Qualitative themes used in the synthesis include ESG, risk management, and digital technologies and data-driven practices, with emphasis on sustainability integration, implementation conditions, and managerial implications.                         | Variables or factors considered include risk management, cost/budget performance, digital technologies and data-driven practices, and multicriteria/fuzzy decision methods, especially those affecting implementation, performance, risk, value, and sustainability outcomes.         | The link with project management is established through risk management, showing how sustainability reshapes planning, implementation, monitoring, control, or success criteria.                                                              | ESG criteria are explicitly addressed, including environmental, social, and governance concerns and their managerial or performance implications. | The key meta-aggregable finding is that digital technologies and data-driven practices requires changes in governance, decision criteria, project practices, or stakeholder coordination to strengthen sustainable outcomes.                                                                              |
| 40 | Yang, Shuang; Chen, Jiancheng; Wang, Xiuru. Water transfer projects and “Water-Energy-Food Nexus” governance from the perspective of game theory. <i>Desalination and Water Treatment</i> , 222 (2021) 16–22. doi: 10.5004/dwt.2021.27106.                                                                                                                                                                        | WEF Nexus governance depends on the strategic interaction of multiple government actors.                                                                                                                  | The sustainability framework or definition is based on governance, digital technologies and data-driven practices, and Water-Energy-Food Nexus, with attention to economic, social, and environmental concerns.                                                | Main productive sector(s): information technology and digital services, agriculture, water management, and corporate CSR programs. | Qualitative themes used in the synthesis include sustainability-related practices and implementation conditions, with emphasis on sustainability integration, implementation conditions, and managerial implications.                                   | Variables or factors considered include sustainability-related practices and implementation conditions, especially those affecting implementation, performance, risk, value, and sustainability outcomes.                                                                             | The link with project management is established through governance, showing how sustainability reshapes planning, implementation, monitoring, control, or success criteria.                                                                   | The evidence addresses social dimension, environmental dimension, and economic dimension, even when no formal TBL label is used.                  | The key meta-aggregable finding is that governance requires changes in governance, decision criteria, project practices, or stakeholder coordination to strengthen sustainable outcomes.                                                                                                                  |
| 41 | Lu, Y., Ding, W., & Xu, S. (2021). Identification and behavioral characteristics of stakeholders of a water diversion project based on ‘sustainable supply chain theory’. <i>Water Supply</i> , 21(7), 3685–3697. <a href="https://doi.org/10.2166/ws.2021.136">https://doi.org/10.2166/ws.2021.136</a> .                                                                                                         | The study adopts sustainable supply chain theory with TBL, economy, society, and environment, as a framework to analyze operation and management of the water-diversion project.                          | The sustainability framework or definition is based on Triple Bottom Line, digital technologies and data-driven practices, and sustainable supply chain, with attention to economic, social, and environmental concerns.                                       | Main productive sector(s): construction and infrastructure, agriculture, and aquaculture and fisheries.                            | Qualitative themes used in the synthesis include Triple Bottom Line, digital technologies and data-driven practices, and sustainable supply chain, with emphasis on sustainability integration, implementation conditions, and managerial implications. | Variables or factors considered include governance, quality outcomes, environmental dimension, and digital technologies and data-driven practices, especially those affecting implementation, performance, risk, value, and sustainability outcomes.                                  | The link with project management is established through Triple Bottom Line, and sustainable supply chain, showing how sustainability reshapes planning, implementation, monitoring, control, or success criteria.                             | The evidence addresses economic dimension, even when no formal TBL label is used.                                                                 | The key meta-aggregable finding is that Triple Bottom Line, stakeholder engagement, cost/budget performance, digital technologies and data-driven practices, and sustainable supply chain requires changes in governance, decision criteria, project practices, or stakeholder coordination to strengthen |

| ID | Reference (Author, Year, DOI)                                                                                                                                                                                                                                                                                                                                                                             | Main Research Aim                                                                                                                                                                                                                                                                                        | Sustainability Framework / Definition                                                                                                                                                                                                                          | Productive Sector(s)                                                                                                              | Qualitative Themes (used in synthesis)                                                                                                                                                                                                                                     | Quantitative Variables / Factors                                                                                                                                                                                                                                                      | Link with Project Management                                                                                                                                                                                                      | TBL / ESG Criteria Applied                                                                                                                        | Key Meta-Aggregable Finding                                                                                                                                                                                                                                                                                        |
|----|-----------------------------------------------------------------------------------------------------------------------------------------------------------------------------------------------------------------------------------------------------------------------------------------------------------------------------------------------------------------------------------------------------------|----------------------------------------------------------------------------------------------------------------------------------------------------------------------------------------------------------------------------------------------------------------------------------------------------------|----------------------------------------------------------------------------------------------------------------------------------------------------------------------------------------------------------------------------------------------------------------|-----------------------------------------------------------------------------------------------------------------------------------|----------------------------------------------------------------------------------------------------------------------------------------------------------------------------------------------------------------------------------------------------------------------------|---------------------------------------------------------------------------------------------------------------------------------------------------------------------------------------------------------------------------------------------------------------------------------------|-----------------------------------------------------------------------------------------------------------------------------------------------------------------------------------------------------------------------------------|---------------------------------------------------------------------------------------------------------------------------------------------------|--------------------------------------------------------------------------------------------------------------------------------------------------------------------------------------------------------------------------------------------------------------------------------------------------------------------|
|    |                                                                                                                                                                                                                                                                                                                                                                                                           |                                                                                                                                                                                                                                                                                                          |                                                                                                                                                                                                                                                                |                                                                                                                                   |                                                                                                                                                                                                                                                                            |                                                                                                                                                                                                                                                                                       |                                                                                                                                                                                                                                   |                                                                                                                                                   | sustainable outcomes.                                                                                                                                                                                                                                                                                              |
| 42 | Pasape, L. (2022). A Review of Success Factors Behind Community Action Research Program (CARP): A Case of Experiences From Smallholder Dairy Farmers of Lushoto in Tanzania. <i>Journal of Participatory Research Methods</i> , 3(2). <a href="https://doi.org/10.35844/001c.37544">https://doi.org/10.35844/001c.37544</a> .                                                                             | CARP is presented as an effective approach for managing agricultural community projects because active participation and a sense of ownership support project sustainability.                                                                                                                            | No single formal definition of sustainability is reported; the article frames the concept through Triple Bottom Line, ESG, SDGs/2030 Agenda, and digital technologies and data-driven practices.                                                               | Main productive sector(s): cross-sectoral productive contexts.                                                                    | Qualitative themes used in the synthesis include sustainability-related practices and implementation conditions, with emphasis on sustainability integration, implementation conditions, and managerial implications.                                                      | Variables or factors considered include digital technologies and data-driven practices, and community action research, especially those affecting implementation, performance, risk, value, and sustainability outcomes.                                                              | The link with project management is established through life-cycle perspective, showing how sustainability reshapes planning, implementation, monitoring, control, or success criteria.                                           | TBL criteria are explicitly addressed through economic, social, and environmental dimensions.                                                     | The key meta-aggregable finding is that digital technologies and data-driven practices requires changes in governance, decision criteria, project practices, or stakeholder coordination to strengthen sustainable outcomes.                                                                                       |
| 43 | Chang, Y.; Liang, Y. Intelligent Risk Assessment of Ecological Agriculture Projects from a Vision of Low Carbon. <i>Sustainability</i> 2023, 15, 5765. <a href="https://doi.org/10.3390/su15075765">https://doi.org/10.3390/su15075765</a> .                                                                                                                                                              | The article defines the ecological agriculture project as a type of sustainable agriculture.                                                                                                                                                                                                             | The sustainability framework or definition is based on GRI reporting standards, and environmental dimension, with attention to environmental dimension.                                                                                                        | Main productive sector(s): information technology and digital services, and agriculture.                                          | Qualitative themes used in the synthesis include GRI reporting standards, environmental dimension, and digital technologies and data-driven practices, with emphasis on sustainability integration, implementation conditions, and managerial implications.                | Variables or factors considered include ESG, GRI reporting standards, risk management, quality outcomes, low-carbon transition, and digital technologies and data-driven practices, especially those affecting implementation, performance, risk, value, and sustainability outcomes. | The link with project management is established through risk management, showing how sustainability reshapes planning, implementation, monitoring, control, or success criteria.                                                  | ESG criteria are explicitly addressed, including environmental, social, and governance concerns and their managerial or performance implications. | The key meta-aggregable finding is that ESG, risk management, and multicriteria/fuzzy decision methods requires changes in governance, decision criteria, project practices, or stakeholder coordination to strengthen sustainable outcomes.                                                                       |
| 44 | Ntsiapane, A.D., Swanepoel, J.W., & Nesamvuni, E.A. (2023). Farmer's Perception on Asset-Based Approach in Agriculture: A Case Study of Smallholder Wool Farming in Thaba Nchu and Botshabelo, Free State Province, South Africa. <i>S. Afr. J. Agric. Ext.</i> , 51(2), 188–206. <a href="https://doi.org/10.17159/2413-3221/2023/v51n2a14065">https://doi.org/10.17159/2413-3221/2023/v51n2a14065</a> . | The article examines GRI reporting standards in information technology and digital services, and agriculture, emphasizing its relevance for sustainability-oriented management.                                                                                                                          | No single formal definition of sustainability is reported; the article frames the concept through digital technologies and data-driven practices.                                                                                                              | Main productive sector(s): agriculture.                                                                                           | Qualitative themes used in the synthesis include digital technologies and data-driven practices, with emphasis on sustainability integration, implementation conditions, and managerial implications.                                                                      | Variables or factors considered include digital technologies and data-driven practices, especially those affecting implementation, performance, risk, value, and sustainability outcomes.                                                                                             | The link with project management is established through digital technologies and data-driven practices, showing how sustainability reshapes planning, implementation, monitoring, control, or success criteria.                   | TBL criteria are explicitly addressed through economic, social, and environmental dimensions.                                                     | The key meta-aggregable finding is that digital technologies and data-driven practices requires changes in governance, decision criteria, project practices, or stakeholder coordination to strengthen sustainable outcomes.                                                                                       |
| 45 | Du, Qingxiao; Du, Runping; Sun, Zhuochen. Optimizing Energy Efficiency in Agriculture: Risk Mitigation Strategies for Successful Energy Performance Contracting. <i>IEEE Access</i> , Volume 13, 2025. DOI: 10.1109/ACCESS.2025.3623901.                                                                                                                                                                  | The article examines SDGs/2030 Agenda, GRI reporting standards, and digital technologies and data-driven practices in information technology and digital services, and agriculture, emphasizing its relevance for sustainability-oriented management.                                                    | The sustainability framework or definition is based on GRI reporting standards, and digital technologies and data-driven practices, with attention to economic, social, and environmental concerns.                                                            | Main productive sector(s): information technology and digital services, agriculture, and transport infrastructure.                | Qualitative themes used in the synthesis include GRI reporting standards, with emphasis on sustainability integration, implementation conditions, and managerial implications.                                                                                             | Variables or factors considered include ESG, risk management, environmental dimension, economic dimension, and digital technologies and data-driven practices, especially those affecting implementation, performance, risk, value, and sustainability outcomes.                      | The link with project management is established through life-cycle perspective, showing how sustainability reshapes planning, implementation, monitoring, control, or success criteria.                                           | The evidence addresses economic dimension, even when no formal TBL label is used.                                                                 | The key meta-aggregable finding is that ESG, risk management, and digital technologies and data-driven practices requires changes in governance, decision criteria, project practices, or stakeholder coordination to strengthen sustainable outcomes.                                                             |
| 46 | Sun, Y., Gan, Y., Luo, J., Han, T., Wang, H., Yang, R., & Tian, L. Farm households' livelihood adaptive capacity under multiple pressures of small watershed management. <i>Ecological Indicators</i> , 178 (2025) 114035. <a href="https://doi.org/10.1016/j.ecolind.2025.114035">https://doi.org/10.1016/j.ecolind.2025.114035</a> .                                                                    | The article examines environmental dimension, economic dimension, and digital technologies and data-driven practices in information technology and digital services, emphasizing its relevance for sustainability-oriented management.                                                                   | The sustainability framework or definition is based on SDGs/2030 Agenda, and environmental dimension, with attention to environmental dimension.                                                                                                               | Main productive sector(s): agriculture, aquaculture and fisheries, and events and tourism.                                        | Qualitative themes used in the synthesis include environmental dimension, with emphasis on sustainability integration, implementation conditions, and managerial implications.                                                                                             | Variables or factors considered include GRI reporting standards, especially those affecting implementation, performance, risk, value, and sustainability outcomes.                                                                                                                    | The link with project management is established through PMBOK knowledge areas, showing how sustainability reshapes planning, implementation, monitoring, control, or success criteria.                                            | TBL criteria are explicitly addressed through economic, social, and environmental dimensions.                                                     | The key meta-aggregable finding is that digital technologies and data-driven practices requires changes in governance, decision criteria, project practices, or stakeholder coordination to strengthen sustainable outcomes.                                                                                       |
| 47 | Bageis, Abdulrahman S., Waqar, Ahsan, Sor, Nadhim Hamah, Almujibah, Hamad, Qureshi, Abdul Hannan, Jagadesh, P., Deifalla, Ahmed Farouk, Khan, Muhammad Basit, Dodo, Yakubu, Arbili, Mohamed Moafak, Abuhussain, Mohammed Awad, & Benjddou, Omrane. Evaluation of Factors Affecting the Competitive Advantage of Organizations in Establishing Sustainable Proj.                                           | The article examines quality outcomes in cross-sectoral productive contexts, emphasizing its relevance for sustainability-oriented management.                                                                                                                                                           | The sustainability framework or definition is based on Triple Bottom Line, ESG, SDGs/2030 Agenda, and digital technologies and data-driven practices, with attention to economic, social, and environmental concerns.                                          | Main productive sector(s): construction and infrastructure.                                                                       | Qualitative themes used in the synthesis include digital technologies and data-driven practices, with emphasis on sustainability integration, implementation conditions, and managerial implications.                                                                      | Variables or factors considered include governance, and environmental dimension, especially those affecting implementation, performance, risk, value, and sustainability outcomes.                                                                                                    | The link with project management is established through digital technologies and data-driven practices, showing how sustainability reshapes planning, implementation, monitoring, control, or success criteria.                   | The evidence addresses social dimension, environmental dimension, and economic dimension, even when no formal TBL label is used.                  | The key meta-aggregable finding is that project success criteria, and digital technologies and data-driven practices requires changes in governance, decision criteria, project practices, or stakeholder coordination to strengthen sustainable outcomes.                                                         |
| 48 | Toledo, Roberto; Rodrigues Filho, José; Marchisott, Gustavo; Castro, Hélio; Alves, Cátia; Putnik, Goran. REVIEW OF LITERATURE MODELS THAT ADDRESS SUSTAINABILITY IN PROJECT MANAGEMENT. <i>International Journal for Quality Research</i> , 17(2), 617–634. DOI: 10.24874/IJQR17.02-20. Received 05.07.2022; Accepted 07.03.2023.                                                                         | The article examines financial performance and investment in information technology and digital services, emphasizing its relevance for sustainability-oriented management.                                                                                                                              | The sustainability framework or definition is based on digital technologies and data-driven practices, with attention to economic, social, and environmental concerns.                                                                                         | Main productive sector(s): construction and infrastructure.                                                                       | Qualitative themes used in the synthesis include PMBOK knowledge areas, PRINCE2, ISO project management guidance, and digital technologies and data-driven practices, with emphasis on sustainability integration, implementation conditions, and managerial implications. | Variables or factors considered include digital technologies and data-driven practices, especially those affecting implementation, performance, risk, value, and sustainability outcomes.                                                                                             | The link with project management is established through life-cycle perspective, and financial performance and investment, showing how sustainability reshapes planning, implementation, monitoring, control, or success criteria. | The evidence addresses social dimension, environmental dimension, and economic dimension, even when no formal TBL label is used.                  | The key meta-aggregable finding is that digital technologies and data-driven practices requires changes in governance, decision criteria, project practices, or stakeholder coordination to strengthen sustainable outcomes.                                                                                       |
| 49 | Rego, M. L., & Faillace Junior, J. E. M. (2024, Jan./Apr.). Sustainability project management: A new classification model. <i>Revista de Gestão e Projetos (GeP)</i> , 15(1), 173–186. <a href="https://doi.org/10.5585/gep.v15i1.25461">https://doi.org/10.5585/gep.v15i1.25461</a> .                                                                                                                    | The article examines sustainability-related practices and implementation conditions in information technology and digital services, emphasizing its relevance for sustainability-oriented management.                                                                                                    | The sustainability framework or definition is based on Triple Bottom Line, ESG, and SDGs/2030 Agenda, with attention to economic, social, and environmental concerns.                                                                                          | Main productive sector(s): energy, information technology and digital services, and mining.                                       | Qualitative themes used in the synthesis include Triple Bottom Line, ESG, and digital technologies and data-driven practices, with emphasis on sustainability integration, implementation conditions, and managerial implications.                                         | Variables or factors considered include governance, especially those affecting implementation, performance, risk, value, and sustainability outcomes.                                                                                                                                 | The link with project management is established through digital technologies and data-driven practices, showing how sustainability reshapes planning, implementation, monitoring, control, or success criteria.                   | The evidence addresses social dimension, environmental dimension, and economic dimension, even when no formal TBL label is used.                  | The key meta-aggregable finding is that project success criteria requires changes in governance, decision criteria, project practices, or stakeholder coordination to strengthen sustainable outcomes.                                                                                                             |
| 50 | van der Sluijs, R.; Silvius, G. Exploring the Values of a Sustainable Project Manager. <i>Sustainability</i> 2023, 15, 8006. <a href="https://doi.org/10.3390/su15108006">https://doi.org/10.3390/su15108006</a> .                                                                                                                                                                                        | The article examines stakeholder engagement, social dimension, environmental dimension, economic dimension, and digital technologies and data-driven practices in information technology and digital services, emphasizing its relevance for sustainability-oriented management.                         | The sustainability framework or definition is based on digital technologies and data-driven practices, with attention to economic, social, and environmental concerns.                                                                                         | Main productive sector(s): construction and infrastructure, energy, information technology and digital services, and agriculture. | Qualitative themes used in the synthesis include digital technologies and data-driven practices, with emphasis on sustainability integration, implementation conditions, and managerial implications.                                                                      | Variables or factors considered include governance, especially those affecting implementation, performance, risk, value, and sustainability outcomes.                                                                                                                                 | The link with project management is established through digital technologies and data-driven practices, showing how sustainability reshapes planning, implementation, monitoring, control, or success criteria.                   | TBL criteria are explicitly addressed through economic, social, and environmental dimensions.                                                     | The key meta-aggregable finding is that project success criteria, quality outcomes, time performance, cost/budget performance, social dimension, and environmental dimension requires changes in governance, decision criteria, project practices, or stakeholder coordination to strengthen sustainable outcomes. |
| 51 | Al-Marri, R., Abdalla, G., & Mahdi, E. (2025). Project management maturity in project-based organizations: frameworks, drivers, and the role of sustainability. <i>Future Business Journal</i> , 11:245. <a href="https://doi.org/10.1186/s43093-025-00670-z">https://doi.org/10.1186/s43093-025-00670-z</a> .                                                                                            | The article examines stakeholder engagement, project success criteria, quality outcomes, time performance, cost/budget performance, and digital technologies and data-driven practices in information technology and digital services, emphasizing its relevance for sustainability-oriented management. | The sustainability framework or definition is based on sustainability-related practices and implementation conditions, with attention to economic, social, and environmental concerns.                                                                         | Main productive sector(s): energy.                                                                                                | Qualitative themes used in the synthesis include SDGs/2030 Agenda, with emphasis on sustainability integration, implementation conditions, and managerial implications.                                                                                                    | Variables or factors considered include Triple Bottom Line, especially those affecting implementation, performance, risk, value, and sustainability outcomes.                                                                                                                         | The link with project management is established through project success criteria, showing how sustainability reshapes planning, implementation, monitoring, control, or success criteria.                                         | The evidence addresses social dimension, environmental dimension, and economic dimension, even when no formal TBL label is used.                  | The key meta-aggregable finding is that quality outcomes, time performance, cost/budget performance, and digital technologies and data-driven practices requires changes in governance, decision criteria, project practices, or stakeholder coordination to strengthen sustainable outcomes.                      |
| 52 | Romero-Torres, A.; Leroux, M.-P.; Primeau, M.-D.; Delisle, J.; Coulon, T. Toward Sustainable Project Management Practices: Lessons from the COVID-19 Pandemic Using the Most Significant Change Method. <i>Sustainability</i> 2025, 17, 5999. <a href="https://doi.org/10.3390/su17135999">https://doi.org/10.3390/su17135999</a> .                                                                       | The article examines social dimension, environmental dimension, economic dimension, and digital technologies and data-driven practices in information technology and digital services, emphasizing its relevance for sustainability-oriented management.                                                 | The sustainability framework or definition is based on social dimension, environmental dimension, economic dimension, and digital technologies and data-driven practices, with attention to social dimension, environmental dimension, and economic dimension. | Main productive sector(s): construction and infrastructure, and information technology and digital services.                      | Qualitative themes used in the synthesis include digital technologies and data-driven practices, with emphasis on sustainability integration, implementation conditions, and managerial implications.                                                                      | Variables or factors considered include governance, and digital technologies and data-driven practices, especially those affecting implementation, performance, risk, value, and sustainability outcomes.                                                                             | The link with project management is established through governance, showing how sustainability reshapes planning, implementation, monitoring, control, or success criteria.                                                       | The evidence addresses social dimension, environmental dimension, and economic dimension, even when no formal TBL label is used.                  | The key meta-aggregable finding is that project success criteria, and digital technologies and data-driven practices requires changes in governance, decision criteria, project practices, or stakeholder coordination to strengthen sustainable outcomes.                                                         |
| 53 | Feng, G.; Hao, S.; Li, X. Project Sustainability and Public-Private Partnership: The Role of Government Relation Orientation and Project Governance. <i>Sustainability</i> 2022, 14, 4724. <a href="https://doi.org/10.3390/su14084724">https://doi.org/10.3390/su14084724</a> .                                                                                                                          | The article examines social dimension, environmental dimension, economic dimension, and digital technologies and data-driven practices in information technology and digital services, and PPP infrastructure projects, emphasizing its relevance for sustainability-oriented management.                | The sustainability framework or definition is based on digital technologies and data-driven practices, with attention to economic, social, and environmental concerns.                                                                                         | Main productive sector(s): construction and infrastructure, transport infrastructure, and PPP infrastructure projects.            | Qualitative themes used in the synthesis include digital technologies and data-driven practices, with emphasis on sustainability integration, implementation conditions, and managerial implications.                                                                      | Variables or factors considered include governance, especially those affecting implementation, performance, risk, value, and sustainability outcomes.                                                                                                                                 | The link with project management is established through governance, showing how sustainability reshapes planning, implementation, monitoring, control, or success criteria.                                                       | The evidence addresses social dimension, environmental dimension, and economic dimension, even when no formal TBL label is used.                  | The key meta-aggregable finding is that project success criteria, and digital technologies and data-driven practices requires changes in governance, decision criteria, project practices, or stakeholder coordination to strengthen sustainable outcomes.                                                         |
| 54 | Friedrich, Kevin. A systematic literature review concerning the different interpretations of the role of sustainability in project management. <i>Management Review Quarterly</i> (2023) 73:31–60. <a href="https://doi.org/10.1007/s11301-021-00230-z">https://doi.org/10.1007/s11301-021-00230-z</a> .                                                                                                  | The article examines Brundtland sustainable development definition, and time performance in information technology and digital services, emphasizing its relevance for sustainability-oriented management.                                                                                               | The sustainability framework or definition is based on Brundtland sustainable development definition, with attention to economic, social, and environmental concerns.                                                                                          | Main productive sector(s): cross-sectoral productive contexts.                                                                    | Qualitative themes used in the synthesis include Brundtland sustainable development definition, and digital technologies and data-driven practices, with emphasis on sustainability integration, implementation conditions, and managerial implications.                   | Variables or factors considered include governance, especially those affecting implementation, performance, risk, value, and sustainability outcomes.                                                                                                                                 | The link with project management is established through sustainability-related practices and implementation conditions, showing how sustainability reshapes planning, implementation, monitoring, control, or success criteria.   | TBL criteria are explicitly addressed through economic, social, and environmental dimensions.                                                     | The key meta-aggregable finding is that project success criteria requires changes in governance, decision criteria, project practices, or stakeholder coordination to strengthen sustainable outcomes.                                                                                                             |
| 55 | Moutinho, A.; Sousa, P.; Tereso, A. Applying the PRiSM™                                                                                                                                                                                                                                                                                                                                                   | The article examines Brundtland                                                                                                                                                                                                                                                                          | The sustainability framework or                                                                                                                                                                                                                                | Main productive sector(s):                                                                                                        | Qualitative themes used in the synthesis                                                                                                                                                                                                                                   | Variables or factors considered include                                                                                                                                                                                                                                               | The link with project management is                                                                                                                                                                                               | TBL criteria are explicitly                                                                                                                       | The key meta-aggregable finding is that                                                                                                                                                                                                                                                                            |

| ID | Reference (Author, Year, DOI)                                                                                                                                                                                                                                                                                                                                               | Main Research Aim                                                                                                                                                                                                                                                                     | Sustainability Framework / Definition                                                                                                                                                                                                                                                                | Productive Sector(s)                                                                                                                    | Qualitative Themes (used in synthesis)                                                                                                                                                                                                                                                       | Quantitative Variables / Factors                                                                                                                                                                          | Link with Project Management                                                                                                                                                                                                          | TBL / ESG Criteria Applied                                                                                                       | Key Meta-Aggregable Finding                                                                                                                                                                                                                                                                                             |
|----|-----------------------------------------------------------------------------------------------------------------------------------------------------------------------------------------------------------------------------------------------------------------------------------------------------------------------------------------------------------------------------|---------------------------------------------------------------------------------------------------------------------------------------------------------------------------------------------------------------------------------------------------------------------------------------|------------------------------------------------------------------------------------------------------------------------------------------------------------------------------------------------------------------------------------------------------------------------------------------------------|-----------------------------------------------------------------------------------------------------------------------------------------|----------------------------------------------------------------------------------------------------------------------------------------------------------------------------------------------------------------------------------------------------------------------------------------------|-----------------------------------------------------------------------------------------------------------------------------------------------------------------------------------------------------------|---------------------------------------------------------------------------------------------------------------------------------------------------------------------------------------------------------------------------------------|----------------------------------------------------------------------------------------------------------------------------------|-------------------------------------------------------------------------------------------------------------------------------------------------------------------------------------------------------------------------------------------------------------------------------------------------------------------------|
|    | Methodology to Raise Awareness of the Importance of Using Sustainable Project Management Practices in Organizations. Systems 2025, 13, 69. <a href="https://doi.org/10.3390/systems13020069">https://doi.org/10.3390/systems13020069</a> .                                                                                                                                  | sustainable development definition in information technology and digital services, emphasizing its relevance for sustainability-oriented management.                                                                                                                                  | definition is based on Brundtland sustainable development definition, and digital technologies and data-driven practices, with attention to economic, social, and environmental concerns.                                                                                                            | information technology and digital services.                                                                                            | include Brundtland sustainable development definition, P5/PRiSM sustainable project management guidance, and digital technologies and data-driven practices, with emphasis on sustainability integration, implementation conditions, and managerial implications.                            | digital technologies and data-driven practices, especially those affecting implementation, performance, risk, value, and sustainability outcomes.                                                         | established through social dimension, environmental dimension, and digital technologies and data-driven practices, showing how sustainability reshapes planning, implementation, monitoring, control, or success criteria.            | addressed through economic, social, and environmental dimensions.                                                                | stakeholder engagement, and digital technologies and data-driven practices requires changes in governance, decision criteria, project practices, or stakeholder coordination to strengthen sustainable outcomes.                                                                                                        |
| 56 | Marques, P.; Sousa, P.; Tereso, A. Sustainability in Project Management: PM2 versus PRiSMTM. Sustainability 2023, 15, 15917. <a href="https://doi.org/10.3390/su152215917">https://doi.org/10.3390/su152215917</a> .                                                                                                                                                        | The article examines P5/PRiSM sustainable project management guidance in cross-sectoral productive contexts, emphasizing its relevance for sustainability-oriented management.                                                                                                        | The sustainability framework or definition is based on SDGs/2030 Agenda, with attention to economic, social, and environmental concerns.                                                                                                                                                             | Main productive sector(s): construction and infrastructure.                                                                             | Qualitative themes used in the synthesis include SDGs/2030 Agenda, and P5/PRiSM sustainable project management guidance, with emphasis on sustainability integration, implementation conditions, and managerial implications.                                                                | Variables or factors considered include digital technologies and data-driven practices, especially those affecting implementation, performance, risk, value, and sustainability outcomes.                 | The link with project management is established through PMBOK knowledge areas, and PRINCE2, showing how sustainability reshapes planning, implementation, monitoring, control, or success criteria.                                   | TBL criteria are explicitly addressed through economic, social, and environmental dimensions.                                    | The key meta-aggregable finding is that P5/PRiSM sustainable project management guidance, PMBOK knowledge areas, PRINCE2, and digital technologies and data-driven practices requires changes in governance, decision criteria, project practices, or stakeholder coordination to strengthen sustainable outcomes.      |
| 57 | Klaus-Rosińska, A.; Iwko, J. Stakeholder Management—One of the Clues of Sustainable Project Management—As an Underestimated Factor of Project Success in Small Construction Companies. Sustainability 2021, 13, 9877. <a href="https://doi.org/10.3390/su13179877">https://doi.org/10.3390/su13179877</a> .                                                                 | The article examines financial performance and investment, social dimension, environmental dimension, economic dimension, and digital technologies and data-driven practices in cross-sectoral productive contexts, emphasizing its relevance for sustainability-oriented management. | The sustainability framework or definition is based on financial performance and investment, social dimension, environmental dimension, economic dimension, and digital technologies and data-driven practices, with attention to social dimension, environmental dimension, and economic dimension. | Main productive sector(s): construction and infrastructure.                                                                             | Qualitative themes used in the synthesis include social dimension, and digital technologies and data-driven practices, with emphasis on sustainability integration, implementation conditions, and managerial implications.                                                                  | Variables or factors considered include stakeholder engagement, and governance, especially those affecting implementation, performance, risk, value, and sustainability outcomes.                         | The link with project management is established through digital technologies and data-driven practices, showing how sustainability reshapes planning, implementation, monitoring, control, or success criteria.                       | The evidence addresses social dimension, environmental dimension, and economic dimension, even when no formal TBL label is used. | The key meta-aggregable finding is that stakeholder engagement, and project success criteria requires changes in governance, decision criteria, project practices, or stakeholder coordination to strengthen sustainable outcomes.                                                                                      |
| 58 | Bashir, H., Musa, R., Al Zarooni, H. A., Ojako, U., Haridy, S., & Shamsuzzaman, M. Social sustainability in action: An explorative study of practices in construction project management. Project Leadership and Society, 5 (2024) 100148. <a href="https://doi.org/10.1016/j.plas.2024.100148">https://doi.org/10.1016/j.plas.2024.100148</a> .                            | The article examines SDGs/2030 Agenda, quality outcomes, social dimension, and digital technologies and data-driven practices in cross-sectoral productive contexts, emphasizing its relevance for sustainability-oriented management.                                                | The sustainability framework or definition is based on SDGs/2030 Agenda, quality outcomes, social dimension, and digital technologies and data-driven practices, with attention to social dimension.                                                                                                 | Main productive sector(s): construction and infrastructure.                                                                             | Qualitative themes used in the synthesis include social dimension, and digital technologies and data-driven practices, with emphasis on sustainability integration, implementation conditions, and managerial implications.                                                                  | Variables or factors considered include sustainability-related practices and implementation conditions, especially those affecting implementation, performance, risk, value, and sustainability outcomes. | The link with project management is established through life-cycle perspective, showing how sustainability reshapes planning, implementation, monitoring, control, or success criteria.                                               | The evidence addresses social dimension, environmental dimension, and economic dimension, even when no formal TBL label is used. | The key meta-aggregable finding is that digital technologies and data-driven practices requires changes in governance, decision criteria, project practices, or stakeholder coordination to strengthen sustainable outcomes.                                                                                            |
| 59 | Aljaaidi, K. S., Abdulmajeed, I. A. I., Bafaqeer, S. M., & Habeeb, S. (2025). Exploring gender differences in sustainable project management competencies and awareness of the sustainable development goals (SDGs). Journal of Project Management, 10 (2025), 259–270. <a href="https://doi.org/10.5267/j.jp.m.2025.2.003">https://doi.org/10.5267/j.jp.m.2025.2.003</a> . | The article examines digital technologies and data-driven practices in cross-sectoral productive contexts, emphasizing its relevance for sustainability-oriented management.                                                                                                          | The sustainability framework or definition is based on SDGs/2030 Agenda, and digital technologies and data-driven practices, with attention to economic, social, and environmental concerns.                                                                                                         | Main productive sector(s): information technology and digital services.                                                                 | Qualitative themes used in the synthesis include digital technologies and data-driven practices, with emphasis on sustainability integration, implementation conditions, and managerial implications.                                                                                        | Variables or factors considered include digital technologies and data-driven practices, especially those affecting implementation, performance, risk, value, and sustainability outcomes.                 | The link with project management is established through SDGs/2030 Agenda, and digital technologies and data-driven practices, showing how sustainability reshapes planning, implementation, monitoring, control, or success criteria. | TBL criteria are explicitly addressed through economic, social, and environmental dimensions.                                    | The key meta-aggregable finding is that PMBOK knowledge areas, and digital technologies and data-driven practices requires changes in governance, decision criteria, project practices, or stakeholder coordination to strengthen sustainable outcomes.                                                                 |
| 60 | de la Cruz López, María Pilar; Cartelle Barros, Juan José; del Caño Gochi, Alfredo; Lara Coira, Manuel. New Approach for Managing Sustainability in Projects. Sustainability 2021, 13, 7037. <a href="https://doi.org/10.3390/su13137037">https://doi.org/10.3390/su13137037</a> .                                                                                          | The article examines social dimension, environmental dimension, economic dimension, and digital technologies and data-driven practices in information technology and digital services, emphasizing its relevance for sustainability-oriented management.                              | The sustainability framework or definition is based on digital technologies and data-driven practices, with attention to economic, social, and environmental concerns.                                                                                                                               | Main productive sector(s): construction and infrastructure, energy, and agriculture.                                                    | Qualitative themes used in the synthesis include digital technologies and data-driven practices, with emphasis on sustainability integration, implementation conditions, and managerial implications.                                                                                        | Variables or factors considered include digital technologies and data-driven practices, especially those affecting implementation, performance, risk, value, and sustainability outcomes.                 | The link with project management is established through quality outcomes, time performance, and cost/budget performance, showing how sustainability reshapes planning, implementation, monitoring, control, or success criteria.      | The evidence addresses social dimension, environmental dimension, and economic dimension, even when no formal TBL label is used. | The key meta-aggregable finding is that digital technologies and data-driven practices requires changes in governance, decision criteria, project practices, or stakeholder coordination to strengthen sustainable outcomes.                                                                                            |
| 61 | Santos, José M. R. C. A., & Fernandes, Gabriela. Prioritizing Stakeholders in Collaborative Research and Innovation Projects Toward Sustainability. Project Management Journal, 2024, 55(4), 423–440. DOI: 10.1177/87569728241231266.                                                                                                                                       | The article examines social dimension, environmental dimension, economic dimension, and digital technologies and data-driven practices in information technology and digital services, emphasizing its relevance for sustainability-oriented management.                              | The sustainability framework or definition is based on social dimension, environmental dimension, economic dimension, and digital technologies and data-driven practices, with attention to social dimension, environmental dimension, and economic dimension.                                       | Main productive sector(s): construction and infrastructure, information technology and digital services, and food and beverage systems. | Qualitative themes used in the synthesis include P5/PRiSM sustainable project management guidance, and digital technologies and data-driven practices, with emphasis on sustainability integration, implementation conditions, and managerial implications.                                  | Variables or factors considered include digital technologies and data-driven practices, especially those affecting implementation, performance, risk, value, and sustainability outcomes.                 | The link with project management is established through stakeholder engagement, showing how sustainability reshapes planning, implementation, monitoring, control, or success criteria.                                               | TBL criteria are explicitly addressed through economic, social, and environmental dimensions.                                    | The key meta-aggregable finding is that stakeholder engagement, environmental dimension, and digital technologies and data-driven practices requires changes in governance, decision criteria, project practices, or stakeholder coordination to strengthen sustainable outcomes.                                       |
| 62 | Calderon-Tellez, J. A., Bell, G., Herrera, M. M., & Sato, C. Project management and system dynamics modelling: Time to connect with innovation and sustainability. Systems Research and Behavioral Science. DOI: 10.1002/sres.2926.                                                                                                                                         | The article examines sustainability-related practices and implementation conditions in cross-sectoral productive contexts, emphasizing its relevance for sustainability-oriented management.                                                                                          | The sustainability framework or definition is based on sustainability-related practices and implementation conditions, with attention to economic, social, and environmental concerns.                                                                                                               | Main productive sector(s): construction and infrastructure, and information technology and digital services.                            | Qualitative themes used in the synthesis include Triple Bottom Line, social dimension, environmental dimension, economic dimension, and digital technologies and data-driven practices, with emphasis on sustainability integration, implementation conditions, and managerial implications. | Variables or factors considered include sustainability-related practices and implementation conditions, especially those affecting implementation, performance, risk, value, and sustainability outcomes. | The link with project management is established through sustainability-related practices and implementation conditions, showing how sustainability reshapes planning, implementation, monitoring, control, or success criteria.       | TBL criteria are explicitly addressed through economic, social, and environmental dimensions.                                    | The key meta-aggregable finding is that social dimension, and digital technologies and data-driven practices requires changes in governance, decision criteria, project practices, or stakeholder coordination to strengthen sustainable outcomes.                                                                      |
| 63 | Martínez-Perales, S.; Ortiz-Marcos, I.; Ruiz, J.J.; Lázaro, F.J. Using Certification as a Tool to Develop Sustainability in Project Management. Sustainability 2018, 10, 1408.                                                                                                                                                                                              | The article examines social dimension, environmental dimension, economic dimension, and digital technologies and data-driven practices in information technology and digital services, emphasizing its relevance for sustainability-oriented management.                              | The sustainability framework or definition is based on Triple Bottom Line, social dimension, environmental dimension, economic dimension, and digital technologies and data-driven practices, with attention to social dimension, environmental dimension, and economic dimension.                   | Main productive sector(s): energy.                                                                                                      | Qualitative themes used in the synthesis include Triple Bottom Line, quality outcomes, and digital technologies and data-driven practices, with emphasis on sustainability integration, implementation conditions, and managerial implications.                                              | Variables or factors considered include digital technologies and data-driven practices, especially those affecting implementation, performance, risk, value, and sustainability outcomes.                 | The link with project management is established through sustainability-related practices and implementation conditions, showing how sustainability reshapes planning, implementation, monitoring, control, or success criteria.       | TBL criteria are explicitly addressed through economic, social, and environmental dimensions.                                    | The key meta-aggregable finding is that cost/budget performance, and digital technologies and data-driven practices requires changes in governance, decision criteria, project practices, or stakeholder coordination to strengthen sustainable outcomes.                                                               |
| 64 | Zubizarreta, M.; Ganzarain, J.; Cuadrado, J.; Lizarralde, R. Evaluating Disruptive Innovation Project Management Capabilities. Sustainability 2021, 13, 1. <a href="https://dx.doi.org/10.3390/su13010001">https://dx.doi.org/10.3390/su13010001</a> .                                                                                                                      | The article examines digital technologies and data-driven practices in information technology and digital services, emphasizing its relevance for sustainability-oriented management.                                                                                                 | The sustainability framework or definition is based on digital technologies and data-driven practices, with attention to economic, social, and environmental concerns.                                                                                                                               | Main productive sector(s): construction and infrastructure.                                                                             | Qualitative themes used in the synthesis include digital technologies and data-driven practices, with emphasis on sustainability integration, implementation conditions, and managerial implications.                                                                                        | Variables or factors considered include sustainability-related practices and implementation conditions, especially those affecting implementation, performance, risk, value, and sustainability outcomes. | The link with project management is established through sustainability-related practices and implementation conditions, showing how sustainability reshapes planning, implementation, monitoring, control, or success criteria.       | TBL criteria are explicitly addressed through economic, social, and environmental dimensions.                                    | The key meta-aggregable finding is that digital technologies and data-driven practices requires changes in governance, decision criteria, project practices, or stakeholder coordination to strengthen sustainable outcomes.                                                                                            |
| 65 | Mrzyglocka-Chojnacka, J.; Stanek, S.; Kuchta, D. Defining a Successful Project in Sustainable Project Management through Simulation—A Case Study. Sustainability 2021, 13, 8556. <a href="https://doi.org/10.3390/su13158556">https://doi.org/10.3390/su13158556</a> .                                                                                                      | The article examines social dimension, environmental dimension, economic dimension, and digital technologies and data-driven practices in cross-sectoral productive contexts, emphasizing its relevance for sustainability-oriented management.                                       | The sustainability framework or definition is based on social dimension, environmental dimension, economic dimension, and digital technologies and data-driven practices, with attention to social dimension, environmental dimension, and economic dimension.                                       | Main productive sector(s): public administration.                                                                                       | Qualitative themes used in the synthesis include digital technologies and data-driven practices, with emphasis on sustainability integration, implementation conditions, and managerial implications.                                                                                        | Variables or factors considered include stakeholder engagement, especially those affecting implementation, performance, risk, value, and sustainability outcomes.                                         | The link with project management is established through stakeholder engagement, and project success criteria, showing how sustainability reshapes planning, implementation, monitoring, control, or success criteria.                 | The evidence addresses social dimension, environmental dimension, and economic dimension, even when no formal TBL label is used. | The key meta-aggregable finding is that stakeholder engagement, project success criteria, and digital technologies and data-driven practices requires changes in governance, decision criteria, project practices, or stakeholder coordination to strengthen sustainable outcomes.                                      |
| 66 | Blak Bernat, G.; Qualharini, E.L.; Castro, M.S.; Barcaui, A.B.; Soares, R.R. Sustainability in Project Management and Project Success with Virtual Teams: A Quantitative Analysis Considering Stakeholder Engagement and Knowledge Management. Sustainability 2023, 15, 9834. <a href="https://doi.org/10.3390/su15129834">https://doi.org/10.3390/su15129834</a> .         | The article examines sustainability-related practices and implementation conditions in cross-sectoral productive contexts, emphasizing its relevance for sustainability-oriented management.                                                                                          | The sustainability framework or definition is based on project success criteria, and digital technologies and data-driven practices, with attention to economic, social, and environmental concerns.                                                                                                 | Main productive sector(s): information technology and digital services.                                                                 | Qualitative themes used in the synthesis include sustainability-related practices and implementation conditions, with emphasis on sustainability integration, implementation conditions, and managerial implications.                                                                        | Variables or factors considered include sustainability-related practices and implementation conditions, especially those affecting implementation, performance, risk, value, and sustainability outcomes. | The link with project management is established through sustainability-related practices and implementation conditions, showing how sustainability reshapes planning, implementation, monitoring, control, or success criteria.       | TBL criteria are explicitly addressed through economic, social, and environmental dimensions.                                    | The key meta-aggregable finding is that life-cycle perspective, and digital technologies and data-driven practices requires changes in governance, decision criteria, project practices, or stakeholder coordination to strengthen sustainable outcomes.                                                                |
| 67 | Awuzie, B., & Monyane, T. G. Conceptualizing Sustainability Governance Implementation for Infrastructure Delivery Systems in Developing Countries: Success Factors. Sustainability (2020), 12, 961. doi:10.3390/su12030961.                                                                                                                                                 | The article examines SDGs/2030 Agenda, social dimension, environmental dimension, economic dimension, and digital technologies and data-driven practices in cross-sectoral productive contexts, emphasizing its relevance for sustainability-oriented management.                     | The sustainability framework or definition is based on SDGs/2030 Agenda, and digital technologies and data-driven practices, with attention to economic, social, and environmental concerns.                                                                                                         | Main productive sector(s): transport infrastructure, and healthcare.                                                                    | Qualitative themes used in the synthesis include digital technologies and data-driven practices, with emphasis on sustainability integration, implementation conditions, and managerial implications.                                                                                        | Variables or factors considered include governance, especially those affecting implementation, performance, risk, value, and sustainability outcomes.                                                     | The link with project management is established through digital technologies and data-driven practices, showing how sustainability reshapes planning, implementation, monitoring, control, or success criteria.                       | The evidence addresses social dimension, environmental dimension, and economic dimension, even when no formal TBL label is used. | The key meta-aggregable finding is that project success criteria, quality outcomes, time performance, cost/budget performance, and digital technologies and data-driven practices requires changes in governance, decision criteria, project practices, or stakeholder coordination to strengthen sustainable outcomes. |



| ID | Reference (Author, Year, DOI)                                                                                                                                                                                                                                                                                                                                                    | Main Research Aim                                                                                                                                                                                                                                                            | Sustainability Framework / Definition                                                                                                                                                                                                                                              | Productive Sector(s)                                                                                                    | Qualitative Themes (used in synthesis)                                                                                                                                                                                        | Quantitative Variables / Factors                                                                                                                                                                                                                                          | Link with Project Management                                                                                                                                                                                                                                   | TBL / ESG Criteria Applied                                                                                                       | Key Meta-Aggregable Finding                                                                                                                                                                                                                                                                                                           |
|----|----------------------------------------------------------------------------------------------------------------------------------------------------------------------------------------------------------------------------------------------------------------------------------------------------------------------------------------------------------------------------------|------------------------------------------------------------------------------------------------------------------------------------------------------------------------------------------------------------------------------------------------------------------------------|------------------------------------------------------------------------------------------------------------------------------------------------------------------------------------------------------------------------------------------------------------------------------------|-------------------------------------------------------------------------------------------------------------------------|-------------------------------------------------------------------------------------------------------------------------------------------------------------------------------------------------------------------------------|---------------------------------------------------------------------------------------------------------------------------------------------------------------------------------------------------------------------------------------------------------------------------|----------------------------------------------------------------------------------------------------------------------------------------------------------------------------------------------------------------------------------------------------------------|----------------------------------------------------------------------------------------------------------------------------------|---------------------------------------------------------------------------------------------------------------------------------------------------------------------------------------------------------------------------------------------------------------------------------------------------------------------------------------|
| 68 | Lima, O., Jr.; Fernandes, G.; Tereso, A. Benefits of Adopting Innovation and Sustainability Practices in Project Management within the SME Context. Sustainability 2023, 15, 13411. <a href="https://doi.org/10.3390/su151813411">https://doi.org/10.3390/su151813411</a> .                                                                                                      | The article examines Triple Bottom Line, social dimension, environmental dimension, economic dimension, and digital technologies and data-driven practices in information technology and digital services, emphasizing its relevance for sustainability-oriented management. | The sustainability framework or definition is based on Triple Bottom Line, social dimension, environmental dimension, economic dimension, and digital technologies and data-driven practices, with attention to social dimension, environmental dimension, and economic dimension. | Main productive sector(s): construction and infrastructure.                                                             | Qualitative themes used in the synthesis include Triple Bottom Line, and digital technologies and data-driven practices, with emphasis on sustainability integration, implementation conditions, and managerial implications. | Variables or factors considered include quality outcomes, time performance, cost/budget performance, social dimension, environmental dimension, and economic dimension, especially those affecting implementation, performance, risk, value, and sustainability outcomes. | The link with project management is established through quality outcomes, time performance, and cost/budget performance, showing how sustainability reshapes planning, implementation, monitoring, control, or success criteria.                               | TBL criteria are explicitly addressed through economic, social, and environmental dimensions.                                    | The key meta-aggregable finding is that Triple Bottom Line requires changes in governance, decision criteria, project practices, or stakeholder coordination to strengthen sustainable outcomes.                                                                                                                                      |
| 69 | Zhang, L.; Mohandes, S.R.; Tong, Y.; Cheung, C.; Banihashemi, S.; Shan, M. Sustainability and Digital Transformation within the Project Management Area: A Science Mapping Approach. Buildings 2023, 13, 1355. <a href="https://doi.org/10.3390/buildings13051355">https://doi.org/10.3390/buildings13051355</a> .                                                               | The article examines social dimension, environmental dimension, economic dimension, and digital technologies and data-driven practices in information technology and digital services, emphasizing its relevance for sustainability-oriented management.                     | The sustainability framework or definition is based on social dimension, environmental dimension, economic dimension, and digital technologies and data-driven practices, with attention to social dimension, environmental dimension, and economic dimension.                     | Main productive sector(s): construction and infrastructure.                                                             | Qualitative themes used in the synthesis include social dimension, and digital technologies and data-driven practices, with emphasis on sustainability integration, implementation conditions, and managerial implications.   | Variables or factors considered include governance, and digital technologies and data-driven practices, especially those affecting implementation, performance, risk, value, and sustainability outcomes.                                                                 | The link with project management is established through sustainability-related practices and implementation conditions, showing how sustainability reshapes planning, implementation, monitoring, control, or success criteria.                                | The evidence addresses social dimension, environmental dimension, and economic dimension, even when no formal TBL label is used. | The key meta-aggregable finding is that digital technologies and data-driven practices requires changes in governance, decision criteria, project practices, or stakeholder coordination to strengthen sustainable outcomes.                                                                                                          |
| 70 | Bakhshi, Javad; Matous, Petr; Crawford, Lynn. From Control to Adaptation: Mapping Theoretical Developments of Project Governance Research. Project Management Journal, 1–21. © 2025 Project Management Institute, Inc. DOI: 10.1177/87569728251383503.                                                                                                                           | The article examines stakeholder engagement, governance, and cost/budget performance in information technology and digital services, emphasizing its relevance for sustainability-oriented management.                                                                       | The sustainability framework or definition is based on sustainability-related practices and implementation conditions, with attention to economic, social, and environmental concerns.                                                                                             | Main productive sector(s): cross-sectoral productive contexts.                                                          | Qualitative themes used in the synthesis include digital technologies and data-driven practices, with emphasis on sustainability integration, implementation conditions, and managerial implications.                         | Variables or factors considered include ESG, risk management, governance, and digital technologies and data-driven practices, especially those affecting implementation, performance, risk, value, and sustainability outcomes.                                           | The link with project management is established through sustainability-related practices and implementation conditions, showing how sustainability reshapes planning, implementation, monitoring, control, or success criteria.                                | The evidence addresses social dimension, environmental dimension, and economic dimension, even when no formal TBL label is used. | The key meta-aggregable finding is that stakeholder engagement, governance, project success criteria, digital technologies and data-driven practices, and trust in technology-mediated research requires changes in governance, decision criteria, project practices, or stakeholder coordination to strengthen sustainable outcomes. |
| 71 | Friedrich, Kevin; Wehnert, Peter. Behavioral barriers to sustainable action in project management and how to overcome them☆. International Journal of Project Management, 43 (2025) 102747. Available online 20 July 2025. <a href="https://doi.org/10.1016/j.ijproman.2025.102747">https://doi.org/10.1016/j.ijproman.2025.102747</a> .                                         | The article examines Brundtland sustainable development definition in cross-sectoral productive contexts, emphasizing its relevance for sustainability-oriented management.                                                                                                  | The sustainability framework or definition is based on sustainability-related practices and implementation conditions, with attention to economic, social, and environmental concerns.                                                                                             | Main productive sector(s): automotive industry, agriculture, and healthcare.                                            | Qualitative themes used in the synthesis include digital technologies and data-driven practices, with emphasis on sustainability integration, implementation conditions, and managerial implications.                         | Variables or factors considered include governance, and digital technologies and data-driven practices, especially those affecting implementation, performance, risk, value, and sustainability outcomes.                                                                 | The link with project management is established through digital technologies and data-driven practices, showing how sustainability reshapes planning, implementation, monitoring, control, or success criteria.                                                | The evidence addresses social dimension, environmental dimension, and economic dimension, even when no formal TBL label is used. | The key meta-aggregable finding is that project success criteria requires changes in governance, decision criteria, project practices, or stakeholder coordination to strengthen sustainable outcomes.                                                                                                                                |
| 72 | Alhammadi, A. (2025). The impact of technological innovation on project management performance: The mediating roles of sustainability culture and top management support. Journal of Project Management, 10 (2025), 441–450. doi: 10.52677/j.pjm.2025.5.003.                                                                                                                     | The article examines sustainability-related practices and implementation conditions in cross-sectoral productive contexts, emphasizing its relevance for sustainability-oriented management.                                                                                 | The sustainability framework or definition is based on digital technologies and data-driven practices, with attention to economic, social, and environmental concerns.                                                                                                             | Main productive sector(s): manufacturing.                                                                               | Qualitative themes used in the synthesis include digital technologies and data-driven practices, with emphasis on sustainability integration, implementation conditions, and managerial implications.                         | Variables or factors considered include governance, and digital technologies and data-driven practices, especially those affecting implementation, performance, risk, value, and sustainability outcomes.                                                                 | The link with project management is established through sustainability-related practices and implementation conditions, showing how sustainability reshapes planning, implementation, monitoring, control, or success criteria.                                | The evidence addresses social dimension, environmental dimension, and economic dimension, even when no formal TBL label is used. | The key meta-aggregable finding is that project success criteria, and digital technologies and data-driven practices requires changes in governance, decision criteria, project practices, or stakeholder coordination to strengthen sustainable outcomes.                                                                            |
| 73 | Maysels, R., Figueroa Casas, A., Otero Sarmiento, J. D., & Zuñiga Meneses, S. M. (2023). Conceptualization of alternative food networks in Latin America: a case study of a local food system in Southwestern Colombia. Frontiers in Sustainable Food Systems, 7, 1216116. <a href="https://doi.org/10.3389/fsufs.2023.1216116">https://doi.org/10.3389/fsufs.2023.1216116</a> . | The article examines social dimension, environmental dimension, economic dimension, and digital technologies and data-driven practices in information technology and digital services, emphasizing its relevance for sustainability-oriented management.                     | No single formal definition of sustainability is reported; the article frames the concept through environmental dimension.                                                                                                                                                         | Main productive sector(s): agriculture.                                                                                 | Qualitative themes used in the synthesis include digital technologies and data-driven practices, with emphasis on sustainability integration, implementation conditions, and managerial implications.                         | Variables or factors considered include digital technologies and data-driven practices, especially those affecting implementation, performance, risk, value, and sustainability outcomes.                                                                                 | A direct connection with formal project management standards or life-cycle processes is not explicitly reported.                                                                                                                                               | The evidence addresses economic dimension, even when no formal TBL label is used.                                                | The key meta-aggregable finding is that project success criteria, and digital technologies and data-driven practices requires changes in governance, decision criteria, project practices, or stakeholder coordination to strengthen sustainable outcomes.                                                                            |
| 74 | Barrios-Ulloa, A.; Solano-Barliza, A.; Arrubla-Hoyos, W.; Ojeda-Beltrán, A.; Cama-Pinto, D.; Arrabal-Campos, F.M.; Cama-Pinto, A. Agriculture 5.0 in Colombia: Opportunities Through the Emerging 6G Network. Sustainability 2025, 17, 6664. <a href="https://doi.org/10.3390/su17156664">https://doi.org/10.3390/su17156664</a> .                                               | The article examines GRI reporting standards, social dimension, environmental dimension, and digital technologies and data-driven practices in agriculture, emphasizing its relevance for sustainability-oriented management.                                                | The sustainability framework or definition is based on GRI reporting standards, and digital technologies and data-driven practices, with attention to economic, social, and environmental concerns.                                                                                | Main productive sector(s): agriculture.                                                                                 | Qualitative themes used in the synthesis include GRI reporting standards, with emphasis on sustainability integration, implementation conditions, and managerial implications.                                                | Variables or factors considered include governance, especially those affecting implementation, performance, risk, value, and sustainability outcomes.                                                                                                                     | The link with project management is established through digital technologies and data-driven practices, showing how sustainability reshapes planning, implementation, monitoring, control, or success criteria.                                                | The evidence addresses economic dimension, even when no formal TBL label is used.                                                | The key meta-aggregable finding is that GRI reporting standards requires changes in governance, decision criteria, project practices, or stakeholder coordination to strengthen sustainable outcomes.                                                                                                                                 |
| 75 | Valbuena, D., Gaitán-Cremaschi, D., Cely-Santos, M., & Ochoa-Quintero, J. M. (2025). Exploring the local nexus between human development and environmental sustainability: a case study from Colombia. Sustainability Science, 20, 857–875. <a href="https://doi.org/10.1007/s11625-025-01630-w">https://doi.org/10.1007/s11625-025-01630-w</a> .                                | The article examines quality outcomes, economic dimension, and digital technologies and data-driven practices in water management, and healthcare, emphasizing its relevance for sustainability-oriented management.                                                         | The sustainability framework or definition is based on quality outcomes, environmental dimension, and digital technologies and data-driven practices, with attention to environmental dimension.                                                                                   | Main productive sector(s): agriculture, and mining.                                                                     | Qualitative themes used in the synthesis include quality outcomes, and digital technologies and data-driven practices, with emphasis on sustainability integration, implementation conditions, and managerial implications.   | Variables or factors considered include digital technologies and data-driven practices, especially those affecting implementation, performance, risk, value, and sustainability outcomes.                                                                                 | The link with project management is established through digital technologies and data-driven practices, showing how sustainability reshapes planning, implementation, monitoring, control, or success criteria.                                                | TBL criteria are explicitly addressed through economic, social, and environmental dimensions.                                    | The key meta-aggregable finding is that digital technologies and data-driven practices requires changes in governance, decision criteria, project practices, or stakeholder coordination to strengthen sustainable outcomes.                                                                                                          |
| 76 | León-Camargo, A.; Ochoa-Amaya, J.M.; Peña-Ulloa, L.G.Y. Prioritizing Strategies for Agri-Food Transformation in Meta, Colombia: A Hybrid ANP-DEMATEL-SBWM Model. Sustainability 2025, 17, 11033. <a href="https://doi.org/10.3390/su172411033">https://doi.org/10.3390/su172411033</a> .                                                                                         | The article examines social dimension, environmental dimension, economic dimension, and digital technologies and data-driven practices in information technology and digital services, emphasizing its relevance for sustainability-oriented management.                     | The sustainability framework or definition is based on social dimension, economic dimension, and digital technologies and data-driven practices, with attention to social dimension, and economic dimension.                                                                       | Main productive sector(s): cross-sectoral productive contexts.                                                          | Qualitative themes used in the synthesis include SDGs/2030 Agenda, and digital technologies and data-driven practices, with emphasis on sustainability integration, implementation conditions, and managerial implications.   | Variables or factors considered include sustainability-related practices and implementation conditions, especially those affecting implementation, performance, risk, value, and sustainability outcomes.                                                                 | The link with project management is established through stakeholder engagement, showing how sustainability reshapes planning, implementation, monitoring, control, or success criteria.                                                                        | The evidence addresses social dimension, environmental dimension, and economic dimension, even when no formal TBL label is used. | The key meta-aggregable finding is that sustainability-related practices and implementation conditions requires changes in governance, decision criteria, project practices, or stakeholder coordination to strengthen sustainable outcomes.                                                                                          |
| 77 | Castro-Castro, M., Beltrán-Díaz, A. y Vargas-Espitia, A. (2021). Análisis sistémico de la sostenibilidad económica de unidades de producción agropecuaria familiar en una comunidad campesina de Lebrija, Colombia. La Granja: Revista de Ciencias de la Vida, 34(2), 141–153. <a href="http://doi.org/10.17163/lgr.n34.2021.10">http://doi.org/10.17163/lgr.n34.2021.10</a> .   | The article examines GRI reporting standards, economic dimension, and digital technologies and data-driven practices in agriculture, emphasizing its relevance for sustainability-oriented management.                                                                       | The sustainability framework or definition is based on economic dimension, and digital technologies and data-driven practices, with attention to economic dimension.                                                                                                               | Main productive sector(s): agriculture.                                                                                 | Qualitative themes used in the synthesis include economic dimension, and digital technologies and data-driven practices, with emphasis on sustainability integration, implementation conditions, and managerial implications. | Variables or factors considered include governance, especially those affecting implementation, performance, risk, value, and sustainability outcomes.                                                                                                                     | A direct connection with formal project management standards or life-cycle processes is not explicitly reported.                                                                                                                                               | The evidence addresses social dimension, environmental dimension, and economic dimension, even when no formal TBL label is used. | The key meta-aggregable finding is that GRI reporting standards, and digital technologies and data-driven practices requires changes in governance, decision criteria, project practices, or stakeholder coordination to strengthen sustainable outcomes.                                                                             |
| 78 | Abatecola, G.; Surace, A. Discussing the Use of Complexity Theory in Engineering Management: Implications for Sustainability. Sustainability 2020, 12, 10629; doi:10.3390/su122410629.F85.                                                                                                                                                                                       | The article examines digital technologies and data-driven practices in information technology and digital services, emphasizing its relevance for sustainability-oriented management.                                                                                        | No single formal definition of sustainability is reported; the article frames the concept through digital technologies and data-driven practices.                                                                                                                                  | Main productive sector(s): construction and infrastructure, energy, and healthcare.                                     | Qualitative themes used in the synthesis include digital technologies and data-driven practices, with emphasis on sustainability integration, implementation conditions, and managerial implications.                         | Variables or factors considered include governance, and digital technologies and data-driven practices, especially those affecting implementation, performance, risk, value, and sustainability outcomes.                                                                 | The link with project management is established through digital technologies and data-driven practices, showing how sustainability reshapes planning, implementation, monitoring, control, or success criteria.                                                | TBL criteria are explicitly addressed through economic, social, and environmental dimensions.                                    | The key meta-aggregable finding is that project success criteria, and digital technologies and data-driven practices requires changes in governance, decision criteria, project practices, or stakeholder coordination to strengthen sustainable outcomes.                                                                            |
| 79 | Moreno-Monsalve, N.; Delgado-Ortiz, M.; Rueda-Varón, M.; Fajardo-Moreno, W.S. Sustainable Development and Value Creation, an Approach from the Perspective of Project Management. Sustainability 2023, 15, 472. <a href="https://doi.org/10.3390/su15010472">https://doi.org/10.3390/su15010472</a> .                                                                            | The article examines sustainability-related practices and implementation conditions in information technology and digital services, emphasizing its relevance for sustainability-oriented management.                                                                        | The sustainability framework or definition is based on ESG, and risk management, with attention to economic, social, and environmental concerns.                                                                                                                                   | Main productive sector(s): information technology and digital services.                                                 | Qualitative themes used in the synthesis include digital technologies and data-driven practices, with emphasis on sustainability integration, implementation conditions, and managerial implications.                         | Variables or factors considered include stakeholder engagement, and digital technologies and data-driven practices, especially those affecting implementation, performance, risk, value, and sustainability outcomes.                                                     | The link with project management is established through digital technologies and data-driven practices, showing how sustainability reshapes planning, implementation, monitoring, control, or success criteria.                                                | The evidence addresses social dimension, environmental dimension, and economic dimension, even when no formal TBL label is used. | The key meta-aggregable finding is that project success criteria, and digital technologies and data-driven practices requires changes in governance, decision criteria, project practices, or stakeholder coordination to strengthen sustainable outcomes.                                                                            |
| 80 | Apaolaza, U.; Lizarralde, A.; Oyarbide-Zubillaga, A. Modern Project Management Approaches in Uncertainty Environments: A Comparative Study Based on Action Research. Sustainability 2020, 12, 10542; doi:10.3390/su122410542.                                                                                                                                                    | The article examines digital technologies and data-driven practices in cross-sectoral productive contexts, emphasizing its relevance for sustainability-oriented management.                                                                                                 | No single formal definition of sustainability is reported; the article frames the concept through Triple Bottom Line, ESG, and SDGs/2030 Agenda.                                                                                                                                   | Main productive sector(s): energy, manufacturing, information technology and digital services, and automotive industry. | Qualitative themes used in the synthesis include sustainability-related practices and implementation conditions, with emphasis on sustainability integration, implementation conditions, and managerial implications.         | Variables or factors considered include digital technologies and data-driven practices, especially those affecting implementation, performance, risk, value, and sustainability outcomes.                                                                                 | The link with project management is established through social dimension, environmental dimension, and digital technologies and data-driven practices, showing how sustainability reshapes planning, implementation, monitoring, control, or success criteria. | TBL criteria are explicitly addressed through economic, social, and environmental dimensions.                                    | The key meta-aggregable finding is that sustainability-related practices and implementation conditions requires changes in governance, decision criteria, project practices, or stakeholder coordination to strengthen sustainable outcomes.                                                                                          |
| 81 | Dobrovolskiene, N.; Pozniak, A.; Tvaronavičiene, M. Assessment of the Sustainability of a Real Estate Project Using Multi-Criteria Decision Making. Sustainability 2021, 13, 4352. <a href="https://doi.org/10.3390/su13084352">https://doi.org/10.3390/su13084352</a> .                                                                                                         | The article examines Triple Bottom Line, social dimension, environmental dimension, economic dimension, and digital technologies and data-driven practices in                                                                                                                | The sustainability framework or definition is based on Triple Bottom Line, social dimension, environmental dimension, economic dimension, and digital technologies and data-driven                                                                                                 | Main productive sector(s): construction and infrastructure, and real estate.                                            | Qualitative themes used in the synthesis include sustainability-related practices and implementation conditions, with emphasis on sustainability integration, implementation conditions, and                                  | Variables or factors considered include digital technologies and data-driven practices, especially those affecting implementation, performance, risk, value, and sustainability outcomes.                                                                                 | The link with project management is established through sustainability-related practices and implementation conditions, showing how sustainability reshapes planning, implementation,                                                                          | TBL criteria are explicitly addressed through economic, social, and environmental dimensions.                                    | The key meta-aggregable finding is that sustainability-related practices and implementation conditions requires changes in governance, decision criteria, project practices, or stakeholder                                                                                                                                           |

| ID | Reference (Author, Year, DOI)                                                                                                                                                                                                                                                                                                                                   | Main Research Aim                                                                                                                                                                                                                                        | Sustainability Framework / Definition                                                                                                                                                                                                                                            | Productive Sector(s)                                                                                                      | Qualitative Themes (used in synthesis)                                                                                                                                                                                                                                                          | Quantitative Variables / Factors                                                                                                                                                                                | Link with Project Management                                                                                                                                                                                                          | TBL / ESG Criteria Applied                                                                                                       | Key Meta-Aggregable Finding                                                                                                                                                                                                                                                  |
|----|-----------------------------------------------------------------------------------------------------------------------------------------------------------------------------------------------------------------------------------------------------------------------------------------------------------------------------------------------------------------|----------------------------------------------------------------------------------------------------------------------------------------------------------------------------------------------------------------------------------------------------------|----------------------------------------------------------------------------------------------------------------------------------------------------------------------------------------------------------------------------------------------------------------------------------|---------------------------------------------------------------------------------------------------------------------------|-------------------------------------------------------------------------------------------------------------------------------------------------------------------------------------------------------------------------------------------------------------------------------------------------|-----------------------------------------------------------------------------------------------------------------------------------------------------------------------------------------------------------------|---------------------------------------------------------------------------------------------------------------------------------------------------------------------------------------------------------------------------------------|----------------------------------------------------------------------------------------------------------------------------------|------------------------------------------------------------------------------------------------------------------------------------------------------------------------------------------------------------------------------------------------------------------------------|
|    |                                                                                                                                                                                                                                                                                                                                                                 | information technology and digital services, emphasizing its relevance for sustainability-oriented management.                                                                                                                                           | practices, with attention to social dimension, environmental dimension, and economic dimension.                                                                                                                                                                                  |                                                                                                                           | managerial implications.                                                                                                                                                                                                                                                                        |                                                                                                                                                                                                                 | monitoring, control, or success criteria.                                                                                                                                                                                             |                                                                                                                                  | coordination to strengthen sustainable outcomes.                                                                                                                                                                                                                             |
| 82 | Karim, M.A.; Ong, T.S.; Ng, S.H.; Muhammad, H.; Ali, N.A. Organizational Aspects and Practices for Enhancing Organizational Project Management Maturity. Sustainability 2022, 14, 5113. <a href="https://doi.org/10.3390/su14095113">https://doi.org/10.3390/su14095113</a> .                                                                                   | The article does not provide a single formal sustainability definition; it examines environmental dimension, and digital technologies and data-driven practices in information technology and digital services.                                          | The sustainability framework or definition is based on digital technologies and data-driven practices, with attention to economic, social, and environmental concerns.                                                                                                           | Main productive sector(s): information technology and digital services.                                                   | Qualitative themes used in the synthesis include digital technologies and data-driven practices, with emphasis on sustainability integration, implementation conditions, and managerial implications.                                                                                           | Variables or factors considered include digital technologies and data-driven practices, especially those affecting implementation, performance, risk, value, and sustainability outcomes.                       | The link with project management is established through digital technologies and data-driven practices, showing how sustainability reshapes planning, implementation, monitoring, control, or success criteria.                       | TBL criteria are explicitly addressed through economic, social, and environmental dimensions.                                    | The key meta-aggregable finding is that digital technologies and data-driven practices requires changes in governance, decision criteria, project practices, or stakeholder coordination to strengthen sustainable outcomes.                                                 |
| 83 | Herrera-Reyes, A. T.; de los Ríos Carmenado, I.; Martínez-Almela, J. "Project-Based Governance Framework for an Agri-Food Cooperative". Sustainability 2018, 10, 1881.                                                                                                                                                                                          | The article examines digital technologies and data-driven practices in information technology and digital services, emphasizing its relevance for sustainability-oriented management.                                                                    | The sustainability framework or definition is based on sustainability-related practices and implementation conditions, with attention to economic, social, and environmental concerns.                                                                                           | Main productive sector(s): cross-sectoral productive contexts.                                                            | Qualitative themes used in the synthesis include governance, and digital technologies and data-driven practices, with emphasis on sustainability integration, implementation conditions, and managerial implications.                                                                           | Variables or factors considered include digital technologies and data-driven practices, especially those affecting implementation, performance, risk, value, and sustainability outcomes.                       | The link with project management is established through governance, showing how sustainability reshapes planning, implementation, monitoring, control, or success criteria.                                                           | The evidence addresses social dimension, environmental dimension, and economic dimension, even when no formal TBL label is used. | The key meta-aggregable finding is that governance, and digital technologies and data-driven practices requires changes in governance, decision criteria, project practices, or stakeholder coordination to strengthen sustainable outcomes.                                 |
| 84 | Impact of artificial intelligence on project management (PM): Multi-expert perspectives on advancing knowledge and driving innovation toward PM2030; Laurie Hughes; Reza Kiani Mavi; Masoud Aghajani; Keith Fitzpatrick; Senali Madugoda Gunaratnege; Seyed Ashkan Hosseini Shekarabi; Richard Hughes; Ahmad Khanfar; Ahdieh Khatavakhotan; Neda Kiani Mavi; K. | The article examines SDGs/2030 Agenda, and digital technologies and data-driven practices in cross-sectoral productive contexts, emphasizing its relevance for sustainability-oriented management.                                                       | No single formal definition of sustainability is reported; the article frames the concept through environmental dimension, and digital technologies and data-driven practices.                                                                                                   | Main productive sector(s): information technology and digital services, and healthcare.                                   | Qualitative themes used in the synthesis include environmental dimension, and digital technologies and data-driven practices, with emphasis on sustainability integration, implementation conditions, and managerial implications.                                                              | Variables or factors considered include digital technologies and data-driven practices, especially those affecting implementation, performance, risk, value, and sustainability outcomes.                       | The link with project management is established through time performance, showing how sustainability reshapes planning, implementation, monitoring, control, or success criteria.                                                     | The evidence addresses social dimension, and economic dimension, even when no formal TBL label is used.                          | The key meta-aggregable finding is that SDGs/2030 Agenda, and digital technologies and data-driven practices requires changes in governance, decision criteria, project practices, or stakeholder coordination to strengthen sustainable outcomes.                           |
| 85 | Pimenta, M. L. R., Rosa, B. L., & Pimenta, P. C. R. (2023, set./dez.). Perspectivas futuras para a gestão de projetos e sua relação com a sustentabilidade das organizações. Revista de Gestão e Projetos (GeP), 14(3), 87–110. <a href="https://doi.org/10.5585/gep.v14i3.25016">https://doi.org/10.5585/gep.v14i3.25016</a> .                                 | The article examines sustainability-related practices and implementation conditions in information technology and digital services, emphasizing its relevance for sustainability-oriented management.                                                    | The sustainability framework or definition is based on climate resilience/adaptation, and digital technologies and data-driven practices, with attention to economic, social, and environmental concerns.                                                                        | Main productive sector(s): information technology and digital services.                                                   | Qualitative themes used in the synthesis include digital technologies and data-driven practices, with emphasis on sustainability integration, implementation conditions, and managerial implications.                                                                                           | Variables or factors considered include sustainability-related practices and implementation conditions, especially those affecting implementation, performance, risk, value, and sustainability outcomes.       | The link with project management is established through digital technologies and data-driven practices, showing how sustainability reshapes planning, implementation, monitoring, control, or success criteria.                       | TBL criteria are explicitly addressed through economic, social, and environmental dimensions.                                    | The key meta-aggregable finding is that stakeholder engagement, and digital technologies and data-driven practices requires changes in governance, decision criteria, project practices, or stakeholder coordination to strengthen sustainable outcomes.                     |
| 86 | Nosach, Natalia; Druhova, Olena; Klepikova, Svitlana. Controlling as a Component of Project Management in Agro-Industrial Production. Baltic Journal of Economic Studies, Vol. 9 No. 5, 2023, pp. 186–192. DOI: 10.30525/2256-0742/2023-9-5-186-192.                                                                                                            | The article examines digital technologies and data-driven practices in information technology and digital services, emphasizing its relevance for sustainability-oriented management.                                                                    | The sustainability framework or definition is based on project success criteria, and digital technologies and data-driven practices, with attention to economic, social, and environmental concerns.                                                                             | Main productive sector(s): agriculture.                                                                                   | Qualitative themes used in the synthesis include project success criteria, and digital technologies and data-driven practices, with emphasis on sustainability integration, implementation conditions, and managerial implications.                                                             | Variables or factors considered include digital technologies and data-driven practices, especially those affecting implementation, performance, risk, value, and sustainability outcomes.                       | The link with project management is established through digital technologies and data-driven practices, showing how sustainability reshapes planning, implementation, monitoring, control, or success criteria.                       | The evidence addresses economic dimension, even when no formal TBL label is used.                                                | The key meta-aggregable finding is that sustainability-related practices and implementation conditions requires changes in governance, decision criteria, project practices, or stakeholder coordination to strengthen sustainable outcomes.                                 |
| 87 | Aliu, J.; Oke, A.E.; Kineber, A.F.; Ebekozién, A.; Aigbavboa, C.O.; Alaboud, N.S.; Daoud, A.O. Towards a New Paradigm of Project Management: A Bibliometric Review. Sustainability 2023, 15, 9967. <a href="https://doi.org/10.3390/su15139967">https://doi.org/10.3390/su15139967</a> .                                                                        | The article examines sustainability-related practices and implementation conditions in information technology and digital services, emphasizing its relevance for sustainability-oriented management.                                                    | The sustainability framework or definition is based on digital technologies and data-driven practices, with attention to economic, social, and environmental concerns.                                                                                                           | Main productive sector(s): construction and infrastructure.                                                               | Qualitative themes used in the synthesis include digital technologies and data-driven practices, with emphasis on sustainability integration, implementation conditions, and managerial implications.                                                                                           | Variables or factors considered include governance, and digital technologies and data-driven practices, especially those affecting implementation, performance, risk, value, and sustainability outcomes.       | The link with project management is established through digital technologies and data-driven practices, showing how sustainability reshapes planning, implementation, monitoring, control, or success criteria.                       | The evidence addresses social dimension, environmental dimension, and economic dimension, even when no formal TBL label is used. | The key meta-aggregable finding is that project success criteria, and digital technologies and data-driven practices requires changes in governance, decision criteria, project practices, or stakeholder coordination to strengthen sustainable outcomes.                   |
| 88 | Aljaaidi, K. S., Abdulmajeed, I. A. I., Bafaqeer, S. M., & Habeeb, S. (2025). Green project management competencies and sustainable development goals (SDGs): Empirical evidence. Journal of Project Management, 10, 355–366. <a href="https://doi.org/10.5267/j.jpm.2025.1.004">https://doi.org/10.5267/j.jpm.2025.1.004</a> .                                 | The article examines social dimension, environmental dimension, economic dimension, and digital technologies and data-driven practices in cross-sectoral productive contexts, emphasizing its relevance for sustainability-oriented management.          | The sustainability framework or definition is based on SDGs/2030 Agenda, social dimension, environmental dimension, economic dimension, and digital technologies and data-driven practices, with attention to social dimension, environmental dimension, and economic dimension. | Main productive sector(s): information technology and digital services.                                                   | Qualitative themes used in the synthesis include PMBOK knowledge areas, social dimension, environmental dimension, economic dimension, and digital technologies and data-driven practices, with emphasis on sustainability integration, implementation conditions, and managerial implications. | Variables or factors considered include digital technologies and data-driven practices, especially those affecting implementation, performance, risk, value, and sustainability outcomes.                       | The link with project management is established through digital technologies and data-driven practices, showing how sustainability reshapes planning, implementation, monitoring, control, or success criteria.                       | The evidence addresses social dimension, environmental dimension, and economic dimension, even when no formal TBL label is used. | The key meta-aggregable finding is that SDGs/2030 Agenda, project success criteria, and digital technologies and data-driven practices requires changes in governance, decision criteria, project practices, or stakeholder coordination to strengthen sustainable outcomes. |
| 89 | Plattfaut, R. On the Importance of Project Management Capabilities for Sustainable Business Process Management. Sustainability 2022, 14, 7612. <a href="https://doi.org/10.3390/su14137612">https://doi.org/10.3390/su14137612</a> .                                                                                                                            | The article examines social dimension, environmental dimension, and digital technologies and data-driven practices in information technology and digital services, emphasizing its relevance for sustainability-oriented management.                     | The sustainability framework or definition is based on social dimension, environmental dimension, and digital technologies and data-driven practices, with attention to social dimension, and environmental dimension.                                                           | Main productive sector(s): information technology and digital services, and healthcare.                                   | Qualitative themes used in the synthesis include PMBOK knowledge areas, and PRINCE2, with emphasis on sustainability integration, implementation conditions, and managerial implications.                                                                                                       | Variables or factors considered include digital technologies and data-driven practices, especially those affecting implementation, performance, risk, value, and sustainability outcomes.                       | The link with project management is established through digital technologies and data-driven practices, showing how sustainability reshapes planning, implementation, monitoring, control, or success criteria.                       | TBL criteria are explicitly addressed through economic, social, and environmental dimensions.                                    | The key meta-aggregable finding is that time performance, cost/budget performance, and digital technologies and data-driven practices requires changes in governance, decision criteria, project practices, or stakeholder coordination to strengthen sustainable outcomes.  |
| 90 | Butt, Atif Saleem; Alghababsheh, Mohammad. Exploring the barriers and enablers of technology adoption for managing social sustainability in supply chains. Industrial Management & Data Systems. DOI: 10.1108/IMDS-01-2025-0014.                                                                                                                                | The article examines social dimension, environmental dimension, economic dimension, and digital technologies and data-driven practices in information technology and digital services, emphasizing its relevance for sustainability-oriented management. | The sustainability framework or definition is based on social dimension, environmental dimension, economic dimension, and digital technologies and data-driven practices, with attention to social dimension, environmental dimension, and economic dimension.                   | Main productive sector(s): information technology and digital services, and food and beverage systems.                    | Qualitative themes used in the synthesis include social dimension, environmental dimension, economic dimension, and digital technologies and data-driven practices, with emphasis on sustainability integration, implementation conditions, and managerial implications.                        | Variables or factors considered include social dimension, and digital technologies and data-driven practices, especially those affecting implementation, performance, risk, value, and sustainability outcomes. | The link with project management is established through social dimension, and digital technologies and data-driven practices, showing how sustainability reshapes planning, implementation, monitoring, control, or success criteria. | The evidence addresses social dimension, environmental dimension, and economic dimension, even when no formal TBL label is used. | The key meta-aggregable finding is that social dimension, and digital technologies and data-driven practices requires changes in governance, decision criteria, project practices, or stakeholder coordination to strengthen sustainable outcomes.                           |
| 91 | Mahgoub, A., & Yu, Z. Integrating technology, collaboration, and sustainability in supply chains and project management: A comprehensive review of efficiency, resilience, and strategic alignment. Journal of Project Management, 11 (2026) 35–48. doi: 10.5267/j.jpm.2025.11.004.                                                                             | The article examines SDGs/2030 Agenda, and digital technologies and data-driven practices in information technology and digital services, emphasizing its relevance for sustainability-oriented management.                                              | The sustainability framework or definition is based on SDGs/2030 Agenda, with attention to economic, social, and environmental concerns.                                                                                                                                         | Main productive sector(s): construction and infrastructure, and information technology and digital services.              | Qualitative themes used in the synthesis include sustainability-related practices and implementation conditions, with emphasis on sustainability integration, implementation conditions, and managerial implications.                                                                           | Variables or factors considered include digital technologies and data-driven practices, especially those affecting implementation, performance, risk, value, and sustainability outcomes.                       | The link with project management is established through risk management, showing how sustainability reshapes planning, implementation, monitoring, control, or success criteria.                                                      | TBL criteria are explicitly addressed through economic, social, and environmental dimensions.                                    | The key meta-aggregable finding is that circular economy, environmental dimension, and digital technologies and data-driven practices requires changes in governance, decision criteria, project practices, or stakeholder coordination to strengthen sustainable outcomes.  |
| 92 | Elseknidy, M., Kineber, A. F., Oke, A. E., Elshaboury, N., Abunada, Z., Zamil, A., Alhusban, M., & Ilori, S. A. (2024). Identifying the agile project management implementation barriers for sustainable residential buildings. International Journal of Engineering Business Management, 16, 1–17. DOI: 10.1177/18479790241299634.                             | The article examines project success criteria, and digital technologies and data-driven practices in cross-sectoral productive contexts, emphasizing its relevance for sustainability-oriented management.                                               | The sustainability framework or definition is based on digital technologies and data-driven practices, with attention to economic, social, and environmental concerns.                                                                                                           | Main productive sector(s): construction and infrastructure, and information technology and digital services.              | Qualitative themes used in the synthesis include digital technologies and data-driven practices, with emphasis on sustainability integration, implementation conditions, and managerial implications.                                                                                           | Variables or factors considered include sustainability-related practices and implementation conditions, especially those affecting implementation, performance, risk, value, and sustainability outcomes.       | The link with project management is established through digital technologies and data-driven practices, showing how sustainability reshapes planning, implementation, monitoring, control, or success criteria.                       | TBL criteria are explicitly addressed through economic, social, and environmental dimensions.                                    | The key meta-aggregable finding is that digital technologies and data-driven practices requires changes in governance, decision criteria, project practices, or stakeholder coordination to strengthen sustainable outcomes.                                                 |
| 93 | Barbalho, S. C. M., Toledo, J. C. de, & Silva, I. A. da. The Effect of Stakeholders' Satisfaction and Project Management Performance on Transitions in a Project Management Office. (DOI: 10.1109/ACCESS.2019.2955446).                                                                                                                                         | The article examines sustainability-related practices and implementation conditions in information technology and digital services, emphasizing its relevance for sustainability-oriented management.                                                    | The sustainability framework or definition is based on social dimension, environmental dimension, economic dimension, and digital technologies and data-driven practices, with attention to social dimension, environmental dimension, and economic dimension.                   | Main productive sector(s): information technology and digital services.                                                   | Qualitative themes used in the synthesis include Triple Bottom Line, ESG, SDGs/2030 Agenda, and environmental dimension, with emphasis on sustainability integration, implementation conditions, and managerial implications.                                                                   | Variables or factors considered include governance, especially those affecting implementation, performance, risk, value, and sustainability outcomes.                                                           | The link with project management is established through Triple Bottom Line, ESG, and SDGs/2030 Agenda, showing how sustainability reshapes planning, implementation, monitoring, control, or success criteria.                        | TBL criteria are explicitly addressed through economic, social, and environmental dimensions.                                    | The key meta-aggregable finding is that Triple Bottom Line, ESG, SDGs/2030 Agenda, and digital technologies and data-driven practices requires changes in governance, decision criteria, project practices, or stakeholder coordination to strengthen sustainable outcomes.  |
| 94 | Sarmiento Rojas, J. A., Güiza Pinzón, F. D., & Rueda Varón, M. J. (2024). Characteristics and perceptions of project management in the productive sectors towards a sustainable future. Results in Engineering, 22, 102264.                                                                                                                                     | The article examines sustainability-related practices and implementation conditions in information technology and digital services, emphasizing its relevance for sustainability-oriented management.                                                    | The sustainability framework or definition is based on sustainability-related practices and implementation conditions, with attention to economic, social, and environmental concerns.                                                                                           | Main productive sector(s): construction and infrastructure, information technology and digital services, and agriculture. | Qualitative themes used in the synthesis include digital technologies and data-driven practices, with emphasis on sustainability integration, implementation conditions, and managerial implications.                                                                                           | Variables or factors considered include digital technologies and data-driven practices, especially those affecting implementation, performance, risk, value, and sustainability outcomes.                       | The link with project management is established through time performance, showing how sustainability reshapes planning, implementation, monitoring, control, or success criteria.                                                     | TBL criteria are explicitly addressed through economic, social, and environmental dimensions.                                    | The key meta-aggregable finding is that digital technologies and data-driven practices requires changes in governance, decision criteria, project practices, or stakeholder coordination to strengthen sustainable outcomes.                                                 |
| 95 | Jiménez, V.; Afonso, P.; Fernandes, G. Using Agile Project Management in the Design and Implementation of Activity-Based Costing Systems. Sustainability 2020, 12, 10352.                                                                                                                                                                                       | The article examines social dimension, environmental dimension, economic dimension,                                                                                                                                                                      | The sustainability framework or definition is based on social dimension, environmental dimension, economic                                                                                                                                                                       | Main productive sector(s): cross-sectoral productive contexts.                                                            | Qualitative themes used in the synthesis include sustainability-related practices and implementation conditions, with                                                                                                                                                                           | Variables or factors considered include digital technologies and data-driven practices, especially those affecting                                                                                              | The link with project management is established through sustainability-related practices and implementation                                                                                                                           | The evidence addresses social dimension, environmental dimension, and economic                                                   | The key meta-aggregable finding is that PMBOK knowledge areas requires changes in governance, decision                                                                                                                                                                       |

| ID  | Reference (Author, Year, DOI)                                                                                                                                                                                                                                                                                                                                                               | Main Research Aim                                                                                                                                                                                                                                                                                        | Sustainability Framework / Definition                                                                                                                                                                                                                                              | Productive Sector(s)                                                                                                      | Qualitative Themes (used in synthesis)                                                                                                                                                                                                                                       | Quantitative Variables / Factors                                                                                                                                                                                       | Link with Project Management                                                                                                                                                                                                                                                       | TBL / ESG Criteria Applied                                                                                                                        | Key Meta-Aggregable Finding                                                                                                                                                                                                                                                        |
|-----|---------------------------------------------------------------------------------------------------------------------------------------------------------------------------------------------------------------------------------------------------------------------------------------------------------------------------------------------------------------------------------------------|----------------------------------------------------------------------------------------------------------------------------------------------------------------------------------------------------------------------------------------------------------------------------------------------------------|------------------------------------------------------------------------------------------------------------------------------------------------------------------------------------------------------------------------------------------------------------------------------------|---------------------------------------------------------------------------------------------------------------------------|------------------------------------------------------------------------------------------------------------------------------------------------------------------------------------------------------------------------------------------------------------------------------|------------------------------------------------------------------------------------------------------------------------------------------------------------------------------------------------------------------------|------------------------------------------------------------------------------------------------------------------------------------------------------------------------------------------------------------------------------------------------------------------------------------|---------------------------------------------------------------------------------------------------------------------------------------------------|------------------------------------------------------------------------------------------------------------------------------------------------------------------------------------------------------------------------------------------------------------------------------------|
|     |                                                                                                                                                                                                                                                                                                                                                                                             | and digital technologies and data-driven practices in cross-sectoral productive contexts, emphasizing its relevance for sustainability-oriented management.                                                                                                                                              | dimension, and digital technologies and data-driven practices, with attention to social dimension, environmental dimension, and economic dimension.                                                                                                                                |                                                                                                                           | emphasis on sustainability integration, implementation conditions, and managerial implications.                                                                                                                                                                              | implementation, performance, risk, value, and sustainability outcomes.                                                                                                                                                 | conditions, showing how sustainability reshapes planning, implementation, monitoring, control, or success criteria.                                                                                                                                                                | dimension, even when no formal TBL label is used.                                                                                                 | criteria, project practices, or stakeholder coordination to strengthen sustainable outcomes.                                                                                                                                                                                       |
| 96  | Larsson, J.; Larsson, L. Integration, Application and Importance of Collaboration in Sustainable Project Management. Sustainability 2020, 12, 585; doi:10.3390/su12020585.                                                                                                                                                                                                                  | The article examines life-cycle perspective, stakeholder engagement, social dimension, environmental dimension, economic dimension, and digital technologies and data-driven practices in information technology and digital services, emphasizing its relevance for sustainability-oriented management. | The sustainability framework or definition is based on Brundtland sustainable development definition, and digital technologies and data-driven practices, with attention to economic, social, and environmental concerns.                                                          | Main productive sector(s): construction and infrastructure.                                                               | Qualitative themes used in the synthesis include sustainability-related practices and implementation conditions, with emphasis on sustainability integration, implementation conditions, and managerial implications.                                                        | Variables or factors considered include digital technologies and data-driven practices, especially those affecting implementation, performance, risk, value, and sustainability outcomes.                              | The link with project management is established through sustainability-related practices and implementation conditions, showing how sustainability reshapes planning, implementation, monitoring, control, or success criteria.                                                    | The evidence addresses social dimension, environmental dimension, and economic dimension, even when no formal TBL label is used.                  | The key meta-aggregable finding is that digital technologies and data-driven practices requires changes in governance, decision criteria, project practices, or stakeholder coordination to strengthen sustainable outcomes.                                                       |
| 97  | Stanitsas, M.; Kiriypoulos, K.; Aretoulis, G. Evaluating Organizational Sustainability: A Multi-Criteria Based-Approach to Sustainable Project Management Indicators. Systems 2021, 9, 58. <a href="https://doi.org/10.3390/systems9030058">https://doi.org/10.3390/systems9030058</a> .                                                                                                    | The article examines sustainability-related practices and implementation conditions in cross-sectoral productive contexts, emphasizing its relevance for sustainability-oriented management.                                                                                                             | The sustainability framework or definition is based on Triple Bottom Line, and digital technologies and data-driven practices, with attention to economic, social, and environmental concerns.                                                                                     | Main productive sector(s): construction and infrastructure.                                                               | Qualitative themes used in the synthesis include Triple Bottom Line, and digital technologies and data-driven practices, with emphasis on sustainability integration, implementation conditions, and managerial implications.                                                | Variables or factors considered include sustainability-related practices and implementation conditions, especially those affecting implementation, performance, risk, value, and sustainability outcomes.              | The link with project management is established through sustainability-related practices and implementation conditions, showing how sustainability reshapes planning, implementation, monitoring, control, or success criteria.                                                    | TBL criteria are explicitly addressed through economic, social, and environmental dimensions.                                                     | The key meta-aggregable finding is that sustainability-related practices and implementation conditions requires changes in governance, decision criteria, project practices, or stakeholder coordination to strengthen sustainable outcomes.                                       |
| 98  | Misopoulos, F., Michaelides, R., Salehuddin, M. A., Manthou, V., & Michaelides, Z. (2018). Addressing Organisational Pressures as Drivers towards Sustainability in Manufacturing Projects and Project Management Methodologies. Sustainability, 10(6), 2098. <a href="https://doi.org/10.3390/su10062098">https://doi.org/10.3390/su10062098</a> .                                         | The article examines Triple Bottom Line, social dimension, environmental dimension, economic dimension, and digital technologies and data-driven practices in cross-sectoral productive contexts, emphasizing its relevance for sustainability-oriented management.                                      | The sustainability framework or definition is based on Brundtland sustainable development definition, with attention to economic, social, and environmental concerns.                                                                                                              | Main productive sector(s): cross-sectoral productive contexts.                                                            | Qualitative themes used in the synthesis include Triple Bottom Line, Brundtland sustainable development definition, and digital technologies and data-driven practices, with emphasis on sustainability integration, implementation conditions, and managerial implications. | Variables or factors considered include stakeholder engagement, and digital technologies and data-driven practices, especially those affecting implementation, performance, risk, value, and sustainability outcomes.  | The link with project management is established through PMBOK knowledge areas, and stakeholder engagement, showing how sustainability reshapes planning, implementation, monitoring, control, or success criteria.                                                                 | TBL criteria are explicitly addressed through economic, social, and environmental dimensions.                                                     | The key meta-aggregable finding is that stakeholder engagement, and digital technologies and data-driven practices requires changes in governance, decision criteria, project practices, or stakeholder coordination to strengthen sustainable outcomes.                           |
| 99  | Soares, I.; Fernandes, G.; Santos, J.M.R.C.A. Sustainability in Project Management Practices. Sustainability 2024, 16, 4275. <a href="https://doi.org/10.3390/su16104275">https://doi.org/10.3390/su16104275</a> .                                                                                                                                                                          | The article examines stakeholder engagement, social dimension, and digital technologies and data-driven practices in information technology and digital services, emphasizing its relevance for sustainability-oriented management.                                                                      | The sustainability framework or definition is based on environmental dimension, and economic dimension, with attention to environmental dimension, and economic dimension.                                                                                                         | Main productive sector(s): cross-sectoral productive contexts.                                                            | Qualitative themes used in the synthesis include digital technologies and data-driven practices, with emphasis on sustainability integration, implementation conditions, and managerial implications.                                                                        | Variables or factors considered include SDGs/2030 Agenda, and governance, especially those affecting implementation, performance, risk, value, and sustainability outcomes.                                            | The link with project management is established through life-cycle perspective, showing how sustainability reshapes planning, implementation, monitoring, control, or success criteria.                                                                                            | TBL criteria are explicitly addressed through economic, social, and environmental dimensions.                                                     | The key meta-aggregable finding is that project success criteria, and digital technologies and data-driven practices requires changes in governance, decision criteria, project practices, or stakeholder coordination to strengthen sustainable outcomes.                         |
| 100 | Armenia, S.; Dangelico, R.M.; Nonino, F.; Pompei, A. Sustainable Project Management: A Conceptualization-Oriented Review and a Framework Proposal for Future Studies. Sustainability 2019, 11, 2664.                                                                                                                                                                                        | The article examines Triple Bottom Line, social dimension, environmental dimension, economic dimension, and digital technologies and data-driven practices in information technology and digital services, emphasizing its relevance for sustainability-oriented management.                             | The sustainability framework or definition is based on Triple Bottom Line, social dimension, environmental dimension, economic dimension, and digital technologies and data-driven practices, with attention to social dimension, environmental dimension, and economic dimension. | Main productive sector(s): construction and infrastructure, and information technology and digital services.              | Qualitative themes used in the synthesis include PMBOK knowledge areas, and digital technologies and data-driven practices, with emphasis on sustainability integration, implementation conditions, and managerial implications.                                             | Variables or factors considered include digital technologies and data-driven practices, especially those affecting implementation, performance, risk, value, and sustainability outcomes.                              | The link with project management is established through social dimension, environmental dimension, economic dimension, and digital technologies and data-driven practices, showing how sustainability reshapes planning, implementation, monitoring, control, or success criteria. | TBL criteria are explicitly addressed through economic, social, and environmental dimensions.                                                     | The key meta-aggregable finding is that life-cycle perspective, project success criteria, and digital technologies and data-driven practices requires changes in governance, decision criteria, project practices, or stakeholder coordination to strengthen sustainable outcomes. |
| 101 | Barendsen, W., Muß, A. C., & Silvius, G. (2021). Exploring team members' perceptions of internal sustainability communication in sustainable project management. Project Leadership and Society, 2, 100015.                                                                                                                                                                                 | The article examines life-cycle perspective, stakeholder engagement, social dimension, environmental dimension, economic dimension, and digital technologies and data-driven practices in information technology and digital services, emphasizing its relevance for sustainability-oriented management. | The sustainability framework or definition is based on social dimension, environmental dimension, economic dimension, and digital technologies and data-driven practices, with attention to social dimension, environmental dimension, and economic dimension.                     | Main productive sector(s): information technology and digital services.                                                   | Qualitative themes used in the synthesis include digital technologies and data-driven practices, with emphasis on sustainability integration, implementation conditions, and managerial implications.                                                                        | Variables or factors considered include sustainability-related practices and implementation conditions, especially those affecting implementation, performance, risk, value, and sustainability outcomes.              | The link with project management is established through digital technologies and data-driven practices, showing how sustainability reshapes planning, implementation, monitoring, control, or success criteria.                                                                    | The evidence addresses social dimension, environmental dimension, and economic dimension, even when no formal TBL label is used.                  | The key meta-aggregable finding is that digital technologies and data-driven practices requires changes in governance, decision criteria, project practices, or stakeholder coordination to strengthen sustainable outcomes.                                                       |
| 102 | Madureira, R.C.; Silva, C.S.; Amorim, M.; Ferreira Dias, M.; Lins, B.; Mello, G. Think Twice to Achieve a Sustainable Project Management: From Ecological Sustainability towards the Sustainable Project Management Cube Model. Sustainability 2022, 14, 3436. <a href="https://doi.org/10.3390/su14063436">https://doi.org/10.3390/su14063436</a> .                                        | The article examines Brundtland sustainable development definition in information technology and digital services, emphasizing its relevance for sustainability-oriented management.                                                                                                                     | The sustainability framework or definition is based on social dimension, environmental dimension, economic dimension, and digital technologies and data-driven practices, with attention to social dimension, environmental dimension, and economic dimension.                     | Main productive sector(s): information technology and digital services, and mining.                                       | Qualitative themes used in the synthesis include Triple Bottom Line, SDGs/2030 Agenda, and digital technologies and data-driven practices, with emphasis on sustainability integration, implementation conditions, and managerial implications.                              | Variables or factors considered include sustainability-related practices and implementation conditions, especially those affecting implementation, performance, risk, value, and sustainability outcomes.              | The link with project management is established through digital technologies and data-driven practices, showing how sustainability reshapes planning, implementation, monitoring, control, or success criteria.                                                                    | TBL criteria are explicitly addressed through economic, social, and environmental dimensions.                                                     | The key meta-aggregable finding is that project success criteria, and digital technologies and data-driven practices requires changes in governance, decision criteria, project practices, or stakeholder coordination to strengthen sustainable outcomes.                         |
| 103 | Cervený, L.; Sloup, R.; Červená, T.; Riedl, M.; Palátová, P. Industry 4.0 as an Opportunity and Challenge for the Furniture Industry—A Case Study. Sustainability 2022, 14, 13325. <a href="https://doi.org/10.3390/su142013325">https://doi.org/10.3390/su142013325</a> .                                                                                                                  | The article examines digital technologies and data-driven practices in manufacturing, and information technology and digital services, emphasizing its relevance for sustainability-oriented management.                                                                                                 | No single formal definition of sustainability is reported; the article frames the concept through sustainability-related practices and implementation conditions.                                                                                                                  | Main productive sector(s): cross-sectoral productive contexts.                                                            | Qualitative themes used in the synthesis include digital technologies and data-driven practices, with emphasis on sustainability integration, implementation conditions, and managerial implications.                                                                        | Variables or factors considered include governance, especially those affecting implementation, performance, risk, value, and sustainability outcomes.                                                                  | The link with project management is established through digital technologies and data-driven practices, showing how sustainability reshapes planning, implementation, monitoring, control, or success criteria.                                                                    | ESG criteria are explicitly addressed, including environmental, social, and governance concerns and their managerial or performance implications. | The key meta-aggregable finding is that digital technologies and data-driven practices requires changes in governance, decision criteria, project practices, or stakeholder coordination to strengthen sustainable outcomes.                                                       |
| 104 | Ordoñez-Díaz MM, Rueda-Quirón LV. 2017. Evaluación de los impactos socioambientales asociados a la producción de panela en Santander (Colombia). Corpoica Cienc Tecnol Agropecuaria. 18(2):379-396. DOI: 10.21930/rcta.vol18_num2_art:637.                                                                                                                                                  | The article examines digital technologies and data-driven practices in cross-sectoral productive contexts, emphasizing its relevance for sustainability-oriented management.                                                                                                                             | The sustainability framework or definition is based on sustainability-related practices and implementation conditions, with attention to economic, social, and environmental concerns.                                                                                             | Main productive sector(s): information technology and digital services.                                                   | Qualitative themes used in the synthesis include digital technologies and data-driven practices, with emphasis on sustainability integration, implementation conditions, and managerial implications.                                                                        | Variables or factors considered include digital technologies and data-driven practices, especially those affecting implementation, performance, risk, value, and sustainability outcomes.                              | The link with project management is established through PMBOK knowledge areas, showing how sustainability reshapes planning, implementation, monitoring, control, or success criteria.                                                                                             | TBL criteria are explicitly addressed through economic, social, and environmental dimensions.                                                     | The key meta-aggregable finding is that environmental dimension, and digital technologies and data-driven practices requires changes in governance, decision criteria, project practices, or stakeholder coordination to strengthen sustainable outcomes.                          |
| 105 | Buenas prácticas de manufactura y su contribución al sector panelero. Compiladora: Olga Rocío Vásquez García. Corporación Universitaria Minuto de Dios – UNIMINUTO. Primera edición: 2019. ISBN versión impresa: 978-958-763-365-8. ISBN versión digital: 978-958-763-366-5.                                                                                                                | The article examines digital technologies and data-driven practices in cross-sectoral productive contexts, emphasizing its relevance for sustainability-oriented management.                                                                                                                             | The sustainability framework or definition is based on environmental dimension, and digital technologies and data-driven practices, with attention to environmental dimension.                                                                                                     | Main productive sector(s): information technology and digital services.                                                   | Qualitative themes used in the synthesis include digital technologies and data-driven practices, with emphasis on sustainability integration, implementation conditions, and managerial implications.                                                                        | Variables or factors considered include environmental dimension, and digital technologies and data-driven practices, especially those affecting implementation, performance, risk, value, and sustainability outcomes. | The link with project management is established through environmental dimension, and economic dimension, showing how sustainability reshapes planning, implementation, monitoring, control, or success criteria.                                                                   | The evidence addresses economic dimension, even when no formal TBL label is used.                                                                 | The key meta-aggregable finding is that sustainability-related practices and implementation conditions requires changes in governance, decision criteria, project practices, or stakeholder coordination to strengthen sustainable outcomes.                                       |
| 106 | Montes Cruz, José Joaquín y Franco Forero, Carlos David. "La diferencia en la evaluación de los requisitos de patentabilidad entre países: un caso en el sector panelero", Revista La Propiedad Inmaterial n.° 33, Universidad Externado de Colombia, enero-junio 2022, pp. 147–167. DOI: <a href="https://doi.org/10.18601/16571959.n33.06">https://doi.org/10.18601/16571959.n33.06</a> . | The article does not provide a single formal sustainability definition; it examines environmental dimension, and digital technologies and data-driven practices in information technology and digital services.                                                                                          | No single formal definition of sustainability is reported; the article frames the concept through digital technologies and data-driven practices.                                                                                                                                  | Main productive sector(s): information technology and digital services.                                                   | Qualitative themes used in the synthesis include digital technologies and data-driven practices, with emphasis on sustainability integration, implementation conditions, and managerial implications.                                                                        | Variables or factors considered include digital technologies and data-driven practices, especially those affecting implementation, performance, risk, value, and sustainability outcomes.                              | A direct connection with formal project management standards or life-cycle processes is not explicitly reported.                                                                                                                                                                   | The evidence addresses economic, social, and environmental effects, even when no formal TBL label is used.                                        | The key meta-aggregable finding is that sustainability-related practices and implementation conditions requires changes in governance, decision criteria, project practices, or stakeholder coordination to strengthen sustainable outcomes.                                       |
| 107 | Farooq, Omer. Navigating Sustainability Tensions: Ambidextrous Leadership's Impact on Sustainable Project Performance. Advance Journal of Econometrics and Finance, Vol-3, Issue-4, 2025, pp. 390–398.                                                                                                                                                                                      | The article examines time performance, social dimension, environmental dimension, economic dimension, and digital technologies and data-driven practices in information technology and digital services, emphasizing its relevance for sustainability-oriented management.                               | The sustainability framework or definition is based on social dimension, economic dimension, and digital technologies and data-driven practices, with attention to social dimension, and economic dimension.                                                                       | Main productive sector(s): construction and infrastructure, information technology and digital services, and agriculture. | Qualitative themes used in the synthesis include digital technologies and data-driven practices, with emphasis on sustainability integration, implementation conditions, and managerial implications.                                                                        | Variables or factors considered include governance, and digital technologies and data-driven practices, especially those affecting implementation, performance, risk, value, and sustainability outcomes.              | The link with project management is established through digital technologies and data-driven practices, showing how sustainability reshapes planning, implementation, monitoring, control, or success criteria.                                                                    | The evidence addresses social dimension, environmental dimension, and economic dimension, even when no formal TBL label is used.                  | The key meta-aggregable finding is that project success criteria requires changes in governance, decision criteria, project practices, or stakeholder coordination to strengthen sustainable outcomes.                                                                             |
| 108 | Yeshwanth, M. (2023). Agile Project Management: A New                                                                                                                                                                                                                                                                                                                                       | The article does not provide a single                                                                                                                                                                                                                                                                    | The sustainability framework or                                                                                                                                                                                                                                                    | Main productive sector(s):                                                                                                | Qualitative themes used in the synthesis                                                                                                                                                                                                                                     | Variables or factors considered include                                                                                                                                                                                | The link with project management is                                                                                                                                                                                                                                                | TBL criteria are explicitly                                                                                                                       | The key meta-aggregable finding is that                                                                                                                                                                                                                                            |



| ID  | Reference (Author, Year, DOI)                                                                                                                                                                                                                                                                                                                                           | Main Research Aim                                                                                                                                                                                                                                                            | Sustainability Framework / Definition                                                                                                                                                                                                                                                   | Productive Sector(s)                                                                              | Qualitative Themes (used in synthesis)                                                                                                                                                                                                                                                         | Quantitative Variables / Factors                                                                                                                                                                                                          | Link with Project Management                                                                                                                                                                                                    | TBL / ESG Criteria Applied                                                                                                                        | Key Meta-Aggregable Finding                                                                                                                                                                                                                                                    |
|-----|-------------------------------------------------------------------------------------------------------------------------------------------------------------------------------------------------------------------------------------------------------------------------------------------------------------------------------------------------------------------------|------------------------------------------------------------------------------------------------------------------------------------------------------------------------------------------------------------------------------------------------------------------------------|-----------------------------------------------------------------------------------------------------------------------------------------------------------------------------------------------------------------------------------------------------------------------------------------|---------------------------------------------------------------------------------------------------|------------------------------------------------------------------------------------------------------------------------------------------------------------------------------------------------------------------------------------------------------------------------------------------------|-------------------------------------------------------------------------------------------------------------------------------------------------------------------------------------------------------------------------------------------|---------------------------------------------------------------------------------------------------------------------------------------------------------------------------------------------------------------------------------|---------------------------------------------------------------------------------------------------------------------------------------------------|--------------------------------------------------------------------------------------------------------------------------------------------------------------------------------------------------------------------------------------------------------------------------------|
|     | Normal in Agricultural Domain. Dr. Rajendra Prasad Central Agricultural University, Pusa, Bihar. ARTICLE ID: 003.                                                                                                                                                                                                                                                       | formal sustainability definition; it examines GRI reporting standards in information technology and digital services, and agriculture.                                                                                                                                       | definition is based on GRI reporting standards, and digital technologies and data-driven practices, with attention to economic, social, and environmental concerns.                                                                                                                     | agriculture.                                                                                      | include GRI reporting standards, and digital technologies and data-driven practices, with emphasis on sustainability integration, implementation conditions, and managerial implications.                                                                                                      | sustainability-related practices and implementation conditions, especially those affecting implementation, performance, risk, value, and sustainability outcomes.                                                                         | established through project success criteria, showing how sustainability reshapes planning, implementation, monitoring, control, or success criteria.                                                                           | addressed through economic, social, and environmental dimensions.                                                                                 | digital technologies and data-driven practices requires changes in governance, decision criteria, project practices, or stakeholder coordination to strengthen sustainable outcomes.                                                                                           |
| 109 | Ayon Ponce GI, Álvarez Indacochea AA, Salazar Moran AL, et al. (2024). Enhancing competitiveness in cocoa associations: An integral project management approach based on Porter's Diamond Model. Journal of Infrastructure, Policy and Development. 8(2): 2872. <a href="https://doi.org/10.24294/jipd.v8i2.2872">https://doi.org/10.24294/jipd.v8i2.2872</a> .         | The article does not provide a single formal sustainability definition; it examines Triple Bottom Line, ESG, SDGs/2030 Agenda, GRI reporting standards, and digital technologies and data-driven practices in information technology and digital services, and agriculture.  | No single formal definition of sustainability is reported; the article frames the concept through sustainability-related practices and implementation conditions.                                                                                                                       | Main productive sector(s): agriculture.                                                           | Qualitative themes used in the synthesis include digital technologies and data-driven practices, with emphasis on sustainability integration, implementation conditions, and managerial implications.                                                                                          | Variables or factors considered include governance, especially those affecting implementation, performance, risk, value, and sustainability outcomes.                                                                                     | The link with project management is established through sustainability-related practices and implementation conditions, showing how sustainability reshapes planning, implementation, monitoring, control, or success criteria. | The evidence addresses economic dimension, even when no formal TBL label is used.                                                                 | The key meta-aggregable finding is that project success criteria requires changes in governance, decision criteria, project practices, or stakeholder coordination to strengthen sustainable outcomes.                                                                         |
| 110 | Sanchez-García, E., Martínez-Falcó, J., Marco-Lajara, B., Manresa-Marhuenda, E. Revolutionizing the circular economy through new technologies: A new era of sustainable progress. Environmental Technology & Innovation, 33 (2024) 103509. <a href="https://doi.org/10.1016/j.eti.2023.103509">https://doi.org/10.1016/j.eti.2023.103509</a> .                          | The article examines environmental dimension in information technology and digital services, emphasizing its relevance for sustainability-oriented management.                                                                                                               | The sustainability framework or definition is based on environmental dimension, with attention to environmental dimension.                                                                                                                                                              | Main productive sector(s): information technology and digital services.                           | Qualitative themes used in the synthesis include P5/PRISM sustainable project management guidance, and digital technologies and data-driven practices, with emphasis on sustainability integration, implementation conditions, and managerial implications.                                    | Variables or factors considered include circular economy, governance, and digital technologies and data-driven practices, especially those affecting implementation, performance, risk, value, and sustainability outcomes.               | A direct connection with formal project management standards or life-cycle processes is not explicitly reported.                                                                                                                | The evidence addresses social dimension, environmental dimension, and economic dimension, even when no formal TBL label is used.                  | The key meta-aggregable finding is that project success criteria, and digital technologies and data-driven practices requires changes in governance, decision criteria, project practices, or stakeholder coordination to strengthen sustainable outcomes.                     |
| 111 | Miranda Angarita, G., Fuentes Arévalo, J. A., Hoyos Patiño, J. F., Velásquez Carrascal, B. L & Niño Claro, K. G. (2025). Análisis Del Comportamiento Económico Y Desafíos Del Sector Panelero En La Región Del Catatumbo. Revista FACCEA, 15(1), 55–87. <a href="https://doi.org/10.47847/faccea.v15n1a3">https://doi.org/10.47847/faccea.v15n1a3</a> .                 | The article examines GRI reporting standards, and digital technologies and data-driven practices in information technology and digital services, emphasizing its relevance for sustainability-oriented management.                                                           | The sustainability framework or definition is based on digital technologies and data-driven practices, with attention to economic, social, and environmental concerns.                                                                                                                  | Main productive sector(s): agriculture.                                                           | Qualitative themes used in the synthesis include quality outcomes, and digital technologies and data-driven practices, with emphasis on sustainability integration, implementation conditions, and managerial implications.                                                                    | Variables or factors considered include digital technologies and data-driven practices, especially those affecting implementation, performance, risk, value, and sustainability outcomes.                                                 | The link with project management is established through sustainability-related practices and implementation conditions, showing how sustainability reshapes planning, implementation, monitoring, control, or success criteria. | The evidence addresses social dimension, environmental dimension, and economic dimension, even when no formal TBL label is used.                  | The key meta-aggregable finding is that project success criteria, and digital technologies and data-driven practices requires changes in governance, decision criteria, project practices, or stakeholder coordination to strengthen sustainable outcomes.                     |
| 112 | Dong, H., Dacre, N., & Bailey, A.R. (2021). Sustainability in Complex Agriculture Projects: A Study of Agile Agricultural Co-operative Institutions. British Academy of Management, Lancaster, UK.                                                                                                                                                                      | The article examines SDGs/2030 Agenda, GRI reporting standards, and digital technologies and data-driven practices in information technology and digital services, and agriculture, emphasizing its relevance for sustainability-oriented management.                        | The sustainability framework or definition is based on GRI reporting standards, social dimension, environmental dimension, economic dimension, and digital technologies and data-driven practices, with attention to social dimension, environmental dimension, and economic dimension. | Main productive sector(s): agriculture.                                                           | Qualitative themes used in the synthesis include SDGs/2030 Agenda, GRI reporting standards, social dimension, and digital technologies and data-driven practices, with emphasis on sustainability integration, implementation conditions, and managerial implications.                         | Variables or factors considered include governance, economic dimension, and digital technologies and data-driven practices, especially those affecting implementation, performance, risk, value, and sustainability outcomes.             | The link with project management is established through digital technologies and data-driven practices, showing how sustainability reshapes planning, implementation, monitoring, control, or success criteria.                 | The evidence addresses social dimension, environmental dimension, and economic dimension, even when no formal TBL label is used.                  | The key meta-aggregable finding is that digital technologies and data-driven practices requires changes in governance, decision criteria, project practices, or stakeholder coordination to strengthen sustainable outcomes.                                                   |
| 113 | Marta Ferrer-Serrano   Aitor Salesa. Revisiting the Circular Economy Paradox: A Triple Bottom Line Perspective. Sustainable Development, 2025; 33:7526–7545. <a href="https://doi.org/10.1002/sd.3539">https://doi.org/10.1002/sd.3539</a> .                                                                                                                            | The article examines Triple Bottom Line, and digital technologies and data-driven practices in information technology and digital services, emphasizing its relevance for sustainability-oriented management.                                                                | The sustainability framework or definition is based on circular economy, and digital technologies and data-driven practices, with attention to economic, social, and environmental concerns.                                                                                            | Main productive sector(s): manufacturing.                                                         | Qualitative themes used in the synthesis include digital technologies and data-driven practices, with emphasis on sustainability integration, implementation conditions, and managerial implications.                                                                                          | Variables or factors considered include sustainability-related practices and implementation conditions, especially those affecting implementation, performance, risk, value, and sustainability outcomes.                                 | A direct connection with formal project management standards or life-cycle processes is not explicitly reported.                                                                                                                | The evidence addresses social dimension, environmental dimension, and economic dimension, even when no formal TBL label is used.                  | The key meta-aggregable finding is that project success criteria requires changes in governance, decision criteria, project practices, or stakeholder coordination to strengthen sustainable outcomes.                                                                         |
| 114 | Nogueira, E., Gomes, S., & Lopes, J. M. (2025). Unveiling triple bottom line's influence on business performance. Discover Sustainability, 6(43). <a href="https://doi.org/10.1007/s43621-025-00804-x">https://doi.org/10.1007/s43621-025-00804-x</a> .                                                                                                                 | The article examines Triple Bottom Line, social dimension, environmental dimension, economic dimension, and digital technologies and data-driven practices in information technology and digital services, emphasizing its relevance for sustainability-oriented management. | The sustainability framework or definition is based on Triple Bottom Line, social dimension, environmental dimension, economic dimension, and digital technologies and data-driven practices, with attention to social dimension, environmental dimension, and economic dimension.      | Main productive sector(s): cross-sectoral productive contexts.                                    | Qualitative themes used in the synthesis include Triple Bottom Line, with emphasis on sustainability integration, implementation conditions, and managerial implications.                                                                                                                      | Variables or factors considered include sustainability-related practices and implementation conditions, especially those affecting implementation, performance, risk, value, and sustainability outcomes.                                 | The link with project management is established through digital technologies and data-driven practices, showing how sustainability reshapes planning, implementation, monitoring, control, or success criteria.                 | TBL criteria are explicitly addressed through economic, social, and environmental dimensions.                                                     | The key meta-aggregable finding is that digital technologies and data-driven practices requires changes in governance, decision criteria, project practices, or stakeholder coordination to strengthen sustainable outcomes.                                                   |
| 115 | Lee, M.-J., Pak, A., & Roh, T. (2024). The interplay of institutional pressures, digitalization capability, environmental, social, and governance strategy, and triple bottom line performance: A moderated mediation model. Business Strategy and the Environment, 33(6), 5247–5268. <a href="https://doi.org/10.1002/bse.3755">https://doi.org/10.1002/bse.3755</a> . | The article examines Triple Bottom Line, social dimension, environmental dimension, economic dimension, and digital technologies and data-driven practices in cross-sectoral productive contexts, emphasizing its relevance for sustainability-oriented management.          | The sustainability framework or definition is based on Triple Bottom Line, social dimension, environmental dimension, economic dimension, and digital technologies and data-driven practices, with attention to social dimension, environmental dimension, and economic dimension.      | Main productive sector(s): transport infrastructure.                                              | Qualitative themes used in the synthesis include Triple Bottom Line, ESG, and digital technologies and data-driven practices, with emphasis on sustainability integration, implementation conditions, and managerial implications.                                                             | Variables or factors considered include ESG, governance, and digital technologies and data-driven practices, especially those affecting implementation, performance, risk, value, and sustainability outcomes.                            | A direct connection with formal project management standards or life-cycle processes is not explicitly reported.                                                                                                                | TBL criteria are explicitly addressed through economic, social, and environmental dimensions.                                                     | The key meta-aggregable finding is that digital technologies and data-driven practices requires changes in governance, decision criteria, project practices, or stakeholder coordination to strengthen sustainable outcomes.                                                   |
| 116 | Dichmont, C. M., Dowling, N. A., Pascoe, S., Cannard, T., Pears, R. J., Breen, S., Roberts, T., Leigh, G. M., & Mangel, M. Operationalizing triple bottom line harvest strategies. ICES Journal of Marine Science (2021), 78(2), 731–742. doi:10.1093/icesjms/.                                                                                                         | The article examines Triple Bottom Line, social dimension, environmental dimension, economic dimension, and digital technologies and data-driven practices in information technology and digital services, emphasizing its relevance for sustainability-oriented management. | The sustainability framework or definition is based on Triple Bottom Line, social dimension, environmental dimension, economic dimension, and digital technologies and data-driven practices, with attention to social dimension, environmental dimension, and economic dimension.      | Main productive sector(s): events and tourism.                                                    | Qualitative themes used in the synthesis include Triple Bottom Line, and digital technologies and data-driven practices, with emphasis on sustainability integration, implementation conditions, and managerial implications.                                                                  | Variables or factors considered include Triple Bottom Line, stakeholder engagement, and digital technologies and data-driven practices, especially those affecting implementation, performance, risk, value, and sustainability outcomes. | A direct connection with formal project management standards or life-cycle processes is not explicitly reported.                                                                                                                | ESG criteria are explicitly addressed, including environmental, social, and governance concerns and their managerial or performance implications. | The key meta-aggregable finding is that Triple Bottom Line, digital technologies and data-driven practices, and participatory assessment requires changes in governance, decision criteria, project practices, or stakeholder coordination to strengthen sustainable outcomes. |
| 117 | Awad, D. A., Masoud, H. A., & Hamad, A. (2024). Climate changes and food-borne pathogens: the impact on human health and mitigation strategy. Climatic Change, 177:92. <a href="https://doi.org/10.1007/">https://doi.org/10.1007/</a> .                                                                                                                                | The article examines digital technologies and data-driven practices in information technology and digital services, food and beverage systems, water management, and corporate CSR programs, emphasizing its relevance for sustainability-oriented management.               | The sustainability framework or definition is based on climate resilience/adaptation, and digital technologies and data-driven practices, with attention to economic, social, and environmental concerns.                                                                               | Main productive sector(s): food and beverage systems, agriculture, and aquaculture and fisheries. | Qualitative themes used in the synthesis include digital technologies and data-driven practices, with emphasis on sustainability integration, implementation conditions, and managerial implications.                                                                                          | Variables or factors considered include digital technologies and data-driven practices, especially those affecting implementation, performance, risk, value, and sustainability outcomes.                                                 | A direct connection with formal project management standards or life-cycle processes is not explicitly reported.                                                                                                                | TBL criteria are explicitly addressed through economic, social, and environmental dimensions.                                                     | The key meta-aggregable finding is that digital technologies and data-driven practices requires changes in governance, decision criteria, project practices, or stakeholder coordination to strengthen sustainable outcomes.                                                   |
| 118 | Pasamar, S., Bornay-Barrachina, M., & Morales-Sánchez, R. (2025). Institutional pressures for sustainability: a triple bottom line approach. European Journal of Management and Business Economics, 34(4), 460–484. <a href="https://doi.org/10.1108/EJMBE-07-2022-0241">https://doi.org/10.1108/EJMBE-07-2022-0241</a> .                                               | The article examines Brundtland sustainable development definition in information technology and digital services, emphasizing its relevance for sustainability-oriented management.                                                                                         | The sustainability framework or definition is based on digital technologies and data-driven practices, with attention to economic, social, and environmental concerns.                                                                                                                  | Main productive sector(s): cross-sectoral productive contexts.                                    | Qualitative themes used in the synthesis include digital technologies and data-driven practices, with emphasis on sustainability integration, implementation conditions, and managerial implications.                                                                                          | Variables or factors considered include digital technologies and data-driven practices, especially those affecting implementation, performance, risk, value, and sustainability outcomes.                                                 | A direct connection with formal project management standards or life-cycle processes is not explicitly reported.                                                                                                                | The evidence addresses economic dimension, even when no formal TBL label is used.                                                                 | The key meta-aggregable finding is that digital technologies and data-driven practices requires changes in governance, decision criteria, project practices, or stakeholder coordination to strengthen sustainable outcomes.                                                   |
| 119 | Mishra, P., & Pandey, V. K. (2025). Triple bottom line and environmental sustainability: evolution of global ESG research—a bibliometric analysis. Environmental Sciences Europe, 37:136. <a href="https://doi.org/10.1186/s12302-025-01184-9">https://doi.org/10.1186/s12302-025-01184-9</a> .                                                                         | The article examines Triple Bottom Line in information technology and digital services, emphasizing its relevance for sustainability-oriented management.                                                                                                                    | The sustainability framework or definition is based on Triple Bottom Line, financial performance and investment, social dimension, and digital technologies and data-driven practices, with attention to social dimension.                                                              | Main productive sector(s): information technology and digital services.                           | Qualitative themes used in the synthesis include Triple Bottom Line, ESG, and GRI reporting standards, with emphasis on sustainability integration, implementation conditions, and managerial implications.                                                                                    | Variables or factors considered include ESG, and digital technologies and data-driven practices, especially those affecting implementation, performance, risk, value, and sustainability outcomes.                                        | The link with project management is established through PRINCE2, and life-cycle perspective, showing how sustainability reshapes planning, implementation, monitoring, control, or success criteria.                            | TBL criteria are explicitly addressed through economic, social, and environmental dimensions.                                                     | The key meta-aggregable finding is that ESG, and digital technologies and data-driven practices requires changes in governance, decision criteria, project practices, or stakeholder coordination to strengthen sustainable outcomes.                                          |
| 120 | Cruz Rodríguez, J. A., & Bautista Rodríguez, S. C. (2021). Modelo de gestión del conocimiento ambiental en la agroindustria: Caso sector panelero. Revista Lasallista de Investigación, 18(1).                                                                                                                                                                          | The article examines knowledge management, and environmental dimension in cross-sectoral productive contexts, emphasizing its relevance for sustainability-oriented management.                                                                                              | The sustainability framework or definition is based on Triple Bottom Line, circular economy, and environmental dimension, with attention to environmental dimension.                                                                                                                    | Main productive sector(s): cross-sectoral productive contexts.                                    | Qualitative themes used in the synthesis include Triple Bottom Line, circular economy, knowledge management, environmental dimension, and digital technologies and data-driven practices, with emphasis on sustainability integration, implementation conditions, and managerial implications. | Variables or factors considered include environmental dimension, especially those affecting implementation, performance, risk, value, and sustainability outcomes.                                                                        | The link with project management is established through governance, and knowledge management, showing how sustainability reshapes planning, implementation, monitoring, control, or success criteria.                           | The evidence addresses environmental dimension, even when no formal TBL label is used.                                                            | The key meta-aggregable finding is that environmental dimension requires changes in governance, decision criteria, project practices, or stakeholder coordination to strengthen sustainable outcomes.                                                                          |
| 121 | Kenzhebayeva, A., Mukhamedzhanova, A., Suleimenova, G., & Iztayeva, A. (2025). Sustainable project management: Principles and standards.                                                                                                                                                                                                                                | The article examines digital technologies and data-driven practices in cross-sectoral                                                                                                                                                                                        | The sustainability framework or definition is based on Triple Bottom Line, Brundtland sustainable                                                                                                                                                                                       | Main productive sector(s): cross-sectoral productive contexts.                                    | Qualitative themes used in the synthesis include Triple Bottom Line, Brundtland sustainable development definition, ISO                                                                                                                                                                        | Variables or factors considered include sustainability-related practices and implementation conditions, especially                                                                                                                        | The link with project management is established through digital technologies and data-driven                                                                                                                                    | TBL criteria are explicitly addressed through economic, social, and environmental                                                                 | The key meta-aggregable finding is that digital technologies and data-driven practices requires changes in                                                                                                                                                                     |

| ID  | Reference (Author, Year, DOI)                                                                                                                                                                                                                                 | Main Research Aim                                                                                                                                                                                                                       | Sustainability Framework / Definition                                                                                                                                                                                                                      | Productive Sector(s)                                                   | Qualitative Themes (used in synthesis)                                                                                                                                                                                                                                                    | Quantitative Variables / Factors                                                                                                                                                                                                    | Link with Project Management                                                                                                                                                                                               | TBL / ESG Criteria Applied                                                                                                       | Key Meta-Aggregable Finding                                                                                                                                                                                                                                                             |
|-----|---------------------------------------------------------------------------------------------------------------------------------------------------------------------------------------------------------------------------------------------------------------|-----------------------------------------------------------------------------------------------------------------------------------------------------------------------------------------------------------------------------------------|------------------------------------------------------------------------------------------------------------------------------------------------------------------------------------------------------------------------------------------------------------|------------------------------------------------------------------------|-------------------------------------------------------------------------------------------------------------------------------------------------------------------------------------------------------------------------------------------------------------------------------------------|-------------------------------------------------------------------------------------------------------------------------------------------------------------------------------------------------------------------------------------|----------------------------------------------------------------------------------------------------------------------------------------------------------------------------------------------------------------------------|----------------------------------------------------------------------------------------------------------------------------------|-----------------------------------------------------------------------------------------------------------------------------------------------------------------------------------------------------------------------------------------------------------------------------------------|
|     |                                                                                                                                                                                                                                                               | productive contexts, emphasizing its relevance for sustainability-oriented management.                                                                                                                                                  | development definition, and ISO project management guidance, with attention to economic, social, and environmental concerns.                                                                                                                               |                                                                        | project management guidance, governance, and digital technologies and data-driven practices, with emphasis on sustainability integration, implementation conditions, and managerial implications.                                                                                         | those affecting implementation, performance, risk, value, and sustainability outcomes.                                                                                                                                              | practices, showing how sustainability reshapes planning, implementation, monitoring, control, or success criteria.                                                                                                         | dimensions.                                                                                                                      | governance, decision criteria, project practices, or stakeholder coordination to strengthen sustainable outcomes.                                                                                                                                                                       |
| 122 | Gładysz, B., & Kuchta, D. (2022). Sustainable metrics in project financial risk management. Sustainability, 14, 14247.                                                                                                                                        | The article examines risk management, financial performance and investment, and digital technologies and data-driven practices in cross-sectoral productive contexts, emphasizing its relevance for sustainability-oriented management. | The sustainability framework or definition is based on Triple Bottom Line, ESG, risk management, financial performance and investment, and digital technologies and data-driven practices, with attention to economic, social, and environmental concerns. | Main productive sector(s): cross-sectoral productive contexts.         | Qualitative themes used in the synthesis include Triple Bottom Line, ESG, risk management, financial performance and investment, and digital technologies and data-driven practices, with emphasis on sustainability integration, implementation conditions, and managerial implications. | Variables or factors considered include financial performance and investment, and digital technologies and data-driven practices, especially those affecting implementation, performance, risk, value, and sustainability outcomes. | The link with project management is established through risk management, and financial performance and investment, showing how sustainability reshapes planning, implementation, monitoring, control, or success criteria. | TBL criteria are explicitly addressed through economic, social, and environmental dimensions.                                    | The key meta-aggregable finding is that risk management, financial performance and investment, and digital technologies and data-driven practices requires changes in governance, decision criteria, project practices, or stakeholder coordination to strengthen sustainable outcomes. |
| 123 | Keleş, A. E., Gülek, G. G., & Górecki, J. (2025). Use of project management knowledge areas in civil infrastructure projects: Implications for sustainability assessment and risk analysis. Sustainability, 17, 9129.                                         | The article examines risk management, and digital technologies and data-driven practices in construction and infrastructure, emphasizing its relevance for sustainability-oriented management.                                          | The sustainability framework or definition is based on PMBOK knowledge areas, risk management, and digital technologies and data-driven practices, with attention to economic, social, and environmental concerns.                                         | Main productive sector(s): construction and infrastructure.            | Qualitative themes used in the synthesis include PMBOK knowledge areas, risk management, and digital technologies and data-driven practices, with emphasis on sustainability integration, implementation conditions, and managerial implications.                                         | Variables or factors considered include digital technologies and data-driven practices, especially those affecting implementation, performance, risk, value, and sustainability outcomes.                                           | The link with project management is established through PMBOK knowledge areas, showing how sustainability reshapes planning, implementation, monitoring, control, or success criteria.                                     | The evidence addresses social dimension, environmental dimension, and economic dimension, even when no formal TBL label is used. | The key meta-aggregable finding is that digital technologies and data-driven practices requires changes in governance, decision criteria, project practices, or stakeholder coordination to strengthen sustainable outcomes.                                                            |
| 124 | Rossing, W. A. H., Albicette, M. M., Aguerre, V., Leoni, C., Ruggia, A., & Dogliotti, S. (2021). Crafting actionable knowledge on ecological intensification: Lessons from co-innovation approaches in Uruguay and Europe. Agricultural Systems, 191, 103103. | The article examines GRI reporting standards, and environmental dimension in agriculture, emphasizing its relevance for sustainability-oriented management.                                                                             | The sustainability framework or definition is based on environmental dimension, and participatory assessment, with attention to environmental dimension.                                                                                                   | Main productive sector(s): food and beverage systems, and agriculture. | Qualitative themes used in the synthesis include GRI reporting standards, stakeholder engagement, environmental dimension, and participatory assessment, with emphasis on sustainability integration, implementation conditions, and managerial implications.                             | Variables or factors considered include sustainability-related practices and implementation conditions, especially those affecting implementation, performance, risk, value, and sustainability outcomes.                           | The link with project management is established through stakeholder engagement, showing how sustainability reshapes planning, implementation, monitoring, control, or success criteria.                                    | The evidence addresses social dimension, environmental dimension, and economic dimension, even when no formal TBL label is used. | The key meta-aggregable finding is that GRI reporting standards, and digital technologies and data-driven practices requires changes in governance, decision criteria, project practices, or stakeholder coordination to strengthen sustainable outcomes.                               |
